# Supplementary material for: Feeding ecology and trophic interactions of the narrow-barred Spanish Mackerel (Scomberomorus commerson) in the Central Taiwan Strait
Source: PeerJ. 2025 Nov 14;13:e20350. doi: 10.7717/peerj.20350 (PMC12622235; doi:10.7717/peerj.20350)
Supplement: Supplemental Information 8 [file peerj-13-20350-s008.xlsx]

## Sheet: S. commerson SCA raw data
No.	Y(Taiwan Year)	M	Season	FL	BW	Sex	Fishing method	empty stomach	Decapterus spp.-N	Decapterus spp.-W	Semi-digested fish remains-N	Semi-digested fish remains-W	Scombridae-N (Scomber spp.)	Scombridae-W (Scomber spp.)	Saurida spp.-N	Saurida spp.-W	Encrasicholina spp.-N	Encrasicholina spp. -W	Clupeidae-N (Sardinella lemuru)	Clupeidae-W (Sardinella lemuru)	Trichiurus spp. -N	Trichiurus spp.-W	Loliginidae-N (Uroteuthis spp.)	Loliginidae-W (Uroteuthis spp.)	Loliginidae-N (Uroteuthis spp.)	Loliginidae-W (Uroteuthis spp.)	Semi-digested shrimp remains-N	Semi-digested shrimp remains-W	Katsuwonus spp.-N	Katsuwonus spp.-W	Mene maculata-N	Mene maculata-W	Decapterus maruadsi-N	Decapterus maruadsi-W	Evynnis cardinalis-N	Evynnis cardinalis-W	Ammodytidae-N	Ammodytidae-W	Sepioteuthis lessoniana-N	Sepioteuthis lessoniana-W	Scomber japonicus-N	Scomber japonicus-W	Trachurus japonicus-N	Trachurus japonicus-W	Chirocentrus dorab-N	Chirocentrus dorab-W
1	106	1	Winter	101	8.5	♀	Longline	1				0
2	106	1	Winter	93	7.2	♂	Longline				1	22.11
3	106	2	Spring	99.5	7.4	♀	Longline	1
4	106	2	Spring	73.5	3.4	♂	Driftnet				1	2.41
5	106	2	Spring	75.5	3.7	♂	Driftnet		1	45.82
6	106	2	Spring	72	3.4	♂	Driftnet	1
7	106	2	Spring	72.5	3.5	♀	Driftnet		1	36.95
8	106	2	Spring	79	3.9	♂	Driftnet	1
9	106	2	Spring	72.5	3.1	♂	Trolling net	1
10	106	2	Spring	78	3.6	♂	Trolling net	1
11	106	3	Spring	75	3.8	♂	Trolling net	1
12	106	3	Spring	70	3	♂	Longline				1	24.98
13	106	3	Spring	77	3.7	♀	Longline	1
14	106	3	Spring	71.5	3.1	♂	Longline				1	15																					1	45.9
15	106	3	Spring	102	7.6	♂	Trolling net	1
16	106	3	Spring	80	4.06	♂	Longline	1
17	106	3	Spring	81	4.3	♀	Longline	1
18	106	3	Spring	83	4.4	♀	Trolling net	1
19	106	3	Spring	72	3.3	♂	Trolling net	1
20	106	3	Spring	75.5	3.3	♂	Longline	1
21	106	3	Spring	74	3.4	♂	Longline								1	30.44
22	106	3	Spring	69	3	♂	Trolling net	1
23	106	3	Spring	70	3.2	♂	Longline				1	15.62
24	106	3	Spring	72.5	3.3	♀	Longline				1	1.73
25	106	3	Spring	73	3.4	♂	Driftnet				1	5.09
26	106	3	Spring	79	4.2	♀	Driftnet	1
27	106	3	Spring	106	9.8	♀	Longline																										2	255
28	106	3	Spring	96	7.8	♀	Trolling net	1
29	106	3	Spring	99.5	7.8	♀	Trolling net	1
30	106	3	Spring	103	8.8	♀	Trolling net																										1	210
31	106	3	Spring	93	7	♀	Longline	1
32	106	3	Spring	94.5	7	♂	Longline	1
33	106	3	Spring	103	8.2	♀	Longline	1
34	106	3	Spring	72	3	♂	Driftnet	1
35	106	3	Spring	79	4	♀	Driftnet	1
36	106	3	Spring	68	2.4	♂	Trolling net	1
37	106	3	Spring	71.5	3	♂	Driftnet	1
38	106	3	Spring	71	3	♂	Driftnet	1
39	106	4	Spring	65.5	2.1	♀	Driftnet	1
40	106	4	Spring	66.5	2.2	♀	Driftnet	1
41	106	4	Spring	72.5	2.7	♀	Driftnet	1
42	106	4	Spring	78.5	3.6	♂	Driftnet	1
43	106	4	Spring	68.5	2.4	♂	Driftnet	1
44	106	4	Spring	74	3.1	♂	Driftnet	1
45	106	4	Spring	78.5	3.6	♀	Driftnet	1
46	106	4	Spring	73	3	♀	Driftnet	1
47	106	4	Spring	71.5	3	♀	Driftnet	1
48	106	4	Spring	76	3.6	♂	Longline	1
49	106	4	Spring	100	8	♀	Longline	1
50	106	4	Spring	102	7.6	♀	Trolling net	1
51	106	5	Summer	72	3.2	♀	Driftnet				1	6.66
52	106	5	Summer	74	3.7	♀	Driftnet				1	9.71
53	106	5	Summer	73	2.94	♀	Driftnet	1
54	106	5	Summer	74.5	3.52	♀	Driftnet				1	5.99
55	106	5	Summer	78	4.02	♀	Driftnet	1
56	106	5	Summer	75	3.58	♀	Driftnet	1
57	106	5	Summer	75	3.56	♀	Driftnet	1
58	106	5	Summer	73.5	3.44	♀	Driftnet	1
59	106	5	Summer	76	3.26	♀	Driftnet	1
60	106	5	Summer	75	3.34	♂	Driftnet	1
61	106	5	Summer	69	2.54	♀	Trolling net	1
62	106	5	Summer	73.5	3.12	♀	Driftnet	1
63	106	5	Summer	78	3.4	♀	Driftnet	1
64	106	5	Summer	77.5	3.38	♀	Driftnet	1
65	106	5	Summer	72.5	3.14	♀	Driftnet	1
66	106	5	Summer	77	3.62	♀	Driftnet	1
67	106	5	Summer	69	2.46	♂	Trolling net	1
68	106	5	Summer	73.5	3.28	♀	Driftnet	1
69	106	5	Summer	77	3.58	♀	Driftnet	1
70	106	5	Summer	72	2.72	♀	Driftnet	1
71	106	5	Summer	70	2.86	♂	Driftnet				1	3.36
72	106	5	Summer	68	2.6	♀	Trolling net	1
73	106	5	Summer	71	2.82	♂	Longline	1
74	106	5	Summer	73.5	3	♂	Longline	1
75	106	5	Summer	67	2.26	♂	Driftnet	1
76	106	5	Summer	73	2.7	♀	Longline	1
77	106	5	Summer	72.5	3.12	♂	Driftnet	1
78	106	5	Summer	71	2.78	♂	Driftnet	1
79	106	5	Summer	71	2.88	♂	Driftnet	1
80	106	5	Summer	73.5	2.9	♂	Driftnet	1
81	106	5	Summer	74.5	3.8	♂	Longline	1
82	106	5	Summer	70	2.5	♂	Longline	1
83	106	5	Summer	65	2.08	♂	Driftnet	1
84	106	5	Summer	71	2.64	♀	Longline	1
85	106	5	Summer	73	2.86	♂	Longline	1
86	106	5	Summer	77.5	3.24	♂	Trolling net	1
87	106	5	Summer	75	3.2	♀	Trolling net	1
88	106	5	Summer	71.6	2.62	♂	Trolling net	1
89	106	5	Summer	74.9	3.22	♂	Driftnet				1	3.29
90	106	5	Summer	69.8	2.14	♀	Trolling net	1
91	106	5	Summer	76.8	3.26	♀	Driftnet	1
92	106	5	Summer	75	3.6	♂	Driftnet	1
93	106	5	Summer	77.5	3.34	♂	Driftnet	1
94	106	5	Summer	75	3.2	♂	Driftnet	1
95	106	5	Summer	72.5	2.7	♂	Driftnet	1
96	106	5	Summer	72.5	3.16	♀	Driftnet	1
97	106	5	Summer	84	4.5	♂	Driftnet	1
98	106	5	Summer	73	3.3	♀	Driftnet	1
99	106	5	Summer	75.5	3.5	♀	Driftnet	1
100	106	5	Summer	74	3	♂	Driftnet	1
101	106	5	Summer	77.5	3.2	♀	Driftnet	1
102	106	5	Summer	71.5	2.8	♂	Driftnet	1
103	106	5	Summer	78	2.9	♀	Driftnet	1
104	106	5	Summer	81	4.1	♀	Driftnet	1
105	106	5	Summer	74.5	2.9	♀	Driftnet	1
106	106	5	Summer	82	4.1	♀	Driftnet	1
107	106	5	Summer	78.5	3.6	♂	Driftnet	1
108	106	5	Summer	76	3.3	♀	Driftnet	1
109	106	5	Summer	75.5	3.1	♀	Driftnet	1
110	106	5	Summer	76	3	♀	Driftnet	1
111	106	5	Summer	89	5.1	♂	Longline	1
112	106	5	Summer	80	3.6	♀	Longline	1
113	106	6	Summer	74	3.54	♀	Longline						1	49.41
114	106	6	Summer	76.5	3.32	♂	Longline																										1	29.12
115	106	6	Summer	76.8	3.32	♂	Longline	1
116	106	6	Summer	74.3	3.06	♀	Longline	1
117	106	6	Summer	68	2.2	♂	Trolling net	1
118	106	6	Summer	74.2	3.04	♀	Longline	1
119	106	6	Summer	66.5	2.44	♂	Driftnet				1	3.85
120	106	6	Summer	75.5	3.5	♀	Trolling net	1
121	106	6	Summer	76.5	3.38	♀	Trolling net				1	3.37
122	106	6	Summer	73	2.86	♀	Trolling net		1	8.5	1	3.81											1	21.16
123	106	6	Summer	81.5	3.74	♂	Trolling net				1	1.9
124	106	6	Summer	75.5	3.3	♀	Longline	1
125	106	6	Summer	75.5	3.6	♂	Longline	1
126	106	6	Summer	77.4	3.44	♀	Trolling net				1	4.91
127	106	6	Summer	74.3	3.3	♂	Trolling net				1	0.86
128	106	6	Summer	69.1	2.4	♀	Driftnet				1	2.74
129	106	6	Summer	69.1	2.4	♂	Driftnet	1
130	106	6	Summer	69.3	2.3	♂	Driftnet				1	2.58
131	106	6	Summer	74.1	2.6	♂	Driftnet																												1	9.4
132	106	6	Summer	72.8	2.64	♂	Driftnet																														1	6.06
133	106	6	Summer	70.7	2.46	♂	Driftnet	1
134	106	6	Summer	72.7	3.04	♂	Driftnet				1	2.25
135	106	6	Summer	74.9	2.88	♀	Driftnet	1
136	106	6	Summer	73.6	2.86	♀	Driftnet	1
137	106	6	Summer	69.6	2.44	♀	Driftnet				1	1.75
138	106	6	Summer	81.4	3.84	♀	Driftnet				1	16.16
139	106	6	Summer	79.8	3.74	♀	Driftnet		1	54.49
140	106	7	Summer	75.5	3.5	♀	Longline	1
141	106	7	Summer	74.5	2.9	♀	Longline	1
142	106	8	Autumn	91	5.4	♂	Driftnet	1
143	106	8	Autumn	74	3.2	♂	Trolling net	1
144	106	8	Autumn	75	3.3	♂	Trolling net	1
145	106	8	Autumn	109	10	♂	Trolling net				1	12.41
146	106	8	Autumn	101.6	7.7	♂	Driftnet		1	64.61
147	106	8	Autumn	93	5.7	♀	Driftnet	1
148	106	8	Autumn	80.5	3.7	♂	Longline		1	101.54
149	106	8	Autumn	98.4	7.8	♂	Driftnet				1	7.6
150	106	8	Autumn	110	9.5	♀	Longline														1	146.63
151	106	8	Autumn	86.4	5.1	♂	Longline	1
152	106	8	Autumn	86	5	♀	Longline	1
153	106	9	Autumn	83	4	♂	Driftnet	1
154	106	9	Autumn	59	1.6	♂	Driftnet	1
155	106	9	Autumn	61	1.9	♂	Driftnet	1
156	106	9	Autumn	64	2	♂	Driftnet	1
157	106	9	Autumn	59	1.6	♂	Driftnet	1
158	106	11	Winter	75	3.5	♂	Driftnet	1
159	106	11	Winter	74	3.3		Driftnet	1
160	106	11	Winter	82.5	4.1	♂	Driftnet	1
161	106	11	Winter	71	3.2	♀	Driftnet	1
162	106	11	Winter	73	3.6		Driftnet	1
163	106	11	Winter	75	3.7	♀	Driftnet	1
164	106	11	Winter	75	3.6	♀	Driftnet	1
165	106	11	Winter	71.5	3.3	♂	Driftnet	1
166	106	11	Winter	71.5	3.1	♀	Driftnet	1
167	106	11	Winter	74.5	3.5		Driftnet	1
168	106	11	Winter	75.5	3.6		Driftnet	1
169	106	11	Winter	94	6.7	♀	Driftnet	1
170	106	11	Winter	95	6.4		Driftnet	1
171	106	11	Winter	99	7.7	♀	Driftnet	1
172	106	12	Winter	94	7.5		Driftnet	1
173	106	12	Winter	97.5	7.7		Driftnet	1
174	106	12	Winter	108	11	♀	Trolling net				1	9.39
175	106	12	Winter	100	8.3		Driftnet	1
176	106	12	Winter	102	8.5		Driftnet	1
177	106	12	Winter	100	7.2	♀	Driftnet	1
178	106	12	Winter	97.5	7.1		Driftnet	1
179	106	12	Winter	93	7		Driftnet	1
180	106	12	Winter	98	6.9		Driftnet	1
181	106	12	Winter	105	9.8	♀	Driftnet				1	60.6
182	106	12	Winter	88.5	5.9	♂	Longline	1
183	106	12	Winter	102	8.3	♀	Driftnet														1	100.8
184	106	12	Winter	91.5	5.8	♂	Driftnet	1
185	106	12	Winter	90.5	6	♂	Driftnet	1
186	106	12	Winter	102	9	♀	Driftnet	1
187	106	12	Winter	103.5	8.6		Driftnet		1	57.86
188	106	12	Winter	91.5	6.4		Driftnet	1
189	106	12	Winter	91	6.2	♂	Driftnet	1
190	106	12	Winter	99	7.1	♂	Driftnet	1
191	106	12	Winter	100	7.2		Driftnet	1
192	106	12	Winter	84	5.1	♀	Longline	1
193	106	12	Winter	89	6		Trolling net	1
194	106	12	Winter	93	6.1		Driftnet	1
195	106	12	Winter	93.5	6.6	♀	Driftnet	1
196	106	12	Winter	97	6.9	♀	Driftnet				1	19.46
197	106	12	Winter	93.5	7	♂	Driftnet				1	2.07
198	106	12	Winter	93	7	♀	Driftnet	1
199	106	12	Winter	98	7.3	♀	Driftnet	1
200	106	12	Winter	92	6.7	♀	Longline	1
201	106	12	Winter	98	6.7	♀	Longline	1
202	106	12	Winter	98	7.2	♀	Longline	1
203	106	12	Winter	90.5	6.2	♀	Longline	1
204	106	12	Winter	117	15		Trolling net	1
205	106	12	Winter	117	13.2	♀	Trolling net	1
206	106	12	Winter	121	13		Trolling net	1
207	106	12	Winter	104.5	10.5		Longline	1
208	106	12	Winter	106	9.3	♂	Longline	1
209	106	12	Winter	95.5	7		Longline	1
210	106	12	Winter	92	6.1		Longline	1
211	106	12	Winter	91	6.2		Longline	1
212	106	12	Winter	92	6.4		Longline	1
213	106	12	Winter	93	6		Longline	1
214	106	12	Winter	92	6.4		Longline	1
215	106	12	Winter	90	6		Driftnet	1
216	106	12	Winter	98	5.9		Driftnet	1
217	106	12	Winter	86.5	5.8		Longline	1
218	106	12	Winter	86	5.6		Longline	1
219	106	12	Winter	90	5.5		Driftnet	1
220	106	12	Winter	89	5.2		Trolling net	1
221	106	12	Winter	90	4.9		Longline	1
222	106	12	Winter	85.5	4.8		Trolling net	1
223	106	12	Winter	83	5.3	♂	Trolling net	1
224	106	12	Winter	83	5.1		Longline	1
225	106	12	Winter	92	5.5		Longline	1
226	106	12	Winter	89	5.7		Longline	1
227	106	12	Winter	114	13.1		Trolling net	1
228	106	12	Winter	101.5	8.7		Driftnet	1
229	106	12	Winter	104	9.6	♀	Driftnet				1	5.8
230	106	12	Winter	103	8.9		Driftnet	1
231	106	12	Winter	100	8.1		Driftnet	1
232	106	12	Winter	106	10.5	♂	Driftnet	1
233	106	12	Winter	110	11.3	♀	Longline	1
234	106	12	Winter	91.5	5.7	♂	Driftnet	1
235	106	12	Winter	110	10	♀	Longline	1
236	106	12	Winter	107	12.8		Longline	1
237	106	12	Winter	117	11.9		Trolling net	1
238	106	12	Winter	103	10.2	♂	Longline	1
239	106	12	Winter	112	11.3		Longline	1
240	107	1	Winter	102.5	9	♂	Longline	1
241	107	1	Winter	108	8.6	♂	Longline		1	27.64
242	107	1	Winter	100	8	♀	Longline	1
243	107	1	Winter	98.5	7.2	♀	Longline	1
244	107	1	Winter	96.5	7.2	♀	Longline	1
245	107	1	Winter	95.5	7.1	♂	Longline	1
246	107	1	Winter	94	7.1	♂	Driftnet	1
247	107	1	Winter	94	7	♀	Driftnet	1
248	107	1	Winter	94	6.5	♂	Driftnet	1
249	107	1	Winter	95.5	6.8	♀	Driftnet	1
250	107	1	Winter	91	6.3	♀	Driftnet	1
251	107	1	Winter	93	6.1	♂	Driftnet	1
252	107	1	Winter	91	6.1	♀	Driftnet	1
253	107	1	Winter	93	6.1	♂	Driftnet	1
254	107	1	Winter	91	6	♀	Driftnet				1	9.86
255	107	1	Winter	93	6		Driftnet	1
256	107	1	Winter	88.5	5.6	♂	Longline	1
257	107	1	Winter	88	5.9	♀	Longline	1
258	107	1	Winter	89	5.8	♂	Longline	1
259	107	1	Winter	115	11.4	♀	Longline	1
260	107	1	Winter	104	9	♀	Trolling net	1
261	107	1	Winter	102	8.6	♀	Driftnet	1
262	107	1	Winter	86	5		Longline	1
263	107	1	Winter	98.5	6.7	♂	Driftnet	1
264	107	1	Winter	93.4	5.8		Driftnet	1
265	107	1	Winter	97.5	7.5	♀	Driftnet	1
266	107	1	Winter	92.5	6.2	♂	Driftnet	1
267	107	1	Winter	94	6	♀	Driftnet	1
268	107	1	Winter	95.5	6.3	♀	Driftnet	1
269	107	1	Winter	98.5	6.7	♀	Driftnet		1	55.68
270	107	1	Winter	95	7.1	♂	Driftnet	1
271	107	1	Winter	95.5	6.1		Driftnet	1
272	107	1	Winter	91	6.8		Longline	1
273	107	1	Winter	100	7.8	♀	Longline	1
274	107	1	Winter	97	7.6	♀	Longline	1
275	107	2	Spring	120.5	13.4	♀	Trolling net				1	4.51
276	107	2	Spring	117	12.7		Trolling net	1
277	107	2	Spring	108	11.2	♀	Driftnet		1	72.95
278	107	2	Spring	110	11.5	♂	Trolling net	1
279	107	2	Spring	109	11.4		Driftnet	1
280	107	2	Spring	107	10.3	♀	Driftnet	1
281	107	2	Spring	111	10.5	♀	Longline		1	60.96
282	107	2	Spring	107	10.5	♀	Driftnet	1
283	107	2	Spring	108	11.2		Driftnet	1
284	107	2	Spring	110	11.5		Longline	1
285	107	2	Spring	112	11.4		Longline	1
286	107	2	Spring	110.5	11.1		Longline	1
287	107	2	Spring	91	6	♀	Driftnet		1	7.1
288	107	2	Spring	92	6.1		Driftnet	1
289	107	2	Spring	92.5	6.1	♂	Driftnet				1	42.83
290	107	2	Spring	87.5	6.1	♀	Longline	1
291	107	2	Spring	97.5	7.1	♂	Driftnet	1
292	107	2	Spring	98	7	♀	Driftnet				1	4.72
293	107	2	Spring	98	7	♀	Driftnet	1
294	107	2	Spring	97	7.8	♂	Driftnet	1
295	107	2	Spring	97	7.9	♀	Driftnet				1	3.01
296	107	2	Spring	96.5	8	♀	Driftnet	1
297	107	2	Spring	107.5	12	♂	Driftnet	1
298	107	2	Spring	111.5	12.1		Longline	1
299	107	2	Spring	105	10.2		Driftnet	1
300	107	2	Spring	107	10.3		Driftnet	1
301	107	2	Spring	121	13.5	♀	Trolling net				1	34.57
302	107	2	Spring	89	5.8	♂	Longline	1
303	107	2	Spring	90	5.6	♂	Driftnet	1
304	107	2	Spring	87.5	5.2		Driftnet	1
305	107	2	Spring	88	5.3		Driftnet	1
306	107	2	Spring	80.5	5	♂	Driftnet	1
307	107	2	Spring	89.5	5.6	♂	Driftnet	1
308	107	2	Spring	94	6.1		Longline	1
309	107	2	Spring	110.5	11.2		Driftnet	1
310	107	2	Spring	113	11.1		Driftnet	1
311	107	2	Spring	111	11.5		Driftnet	1
312	107	2	Spring	111	11.4		Driftnet	1
313	107	2	Spring	108	10.3		Longline	1
314	107	2	Spring	115	12		Driftnet	1
315	107	2	Spring	111	11.4		Driftnet	1
316	107	2	Spring	94	6.2		Longline	1
317	107	2	Spring	104	10.4		Longline	1
318	107	2	Spring	104	10.3		Longline	1
319	107	3	Spring	95	6.5	♂	Driftnet	1
320	107	3	Spring	98	7.5	♀	Driftnet								1	220
321	107	3	Spring	98	7.2	♀	Driftnet	1
322	107	3	Spring	93	6.4	♂	Driftnet	1
323	107	3	Spring	96	6.9		Driftnet	1
324	107	3	Spring	95	6.4		Driftnet	1
325	107	3	Spring	91	6.1	♀	Driftnet				1	10
326	107	3	Spring	96	6.8	♂	Driftnet	1
327	107	3	Spring	103	8.8	♀	Driftnet		1	15
328	107	3	Spring	100	8.1		Driftnet	1
329	107	3	Spring	103	9.1		Driftnet	1
330	107	3	Spring	95	7.2	♀	Driftnet	1
331	107	3	Spring	98	7.5	♀	Driftnet	1
332	107	3	Spring	85	6	♂	Driftnet		1	40
333	107	3	Spring	97	7	♀	Driftnet	1
334	107	3	Spring	89	6.6	♀	Driftnet	1
335	107	3	Spring	98	7	♀	Driftnet	1
336	107	3	Spring	109	9.9	♂	Driftnet	1
337	107	3	Spring	110	9.8	♂	Driftnet	1
338	107	3	Spring	106	11.3	♀	Driftnet	1
339	107	3	Spring	121	14	♀	Trolling net	1
340	107	3	Spring	94	6.7		Driftnet	1
341	107	3	Spring	92	6.4		Driftnet	1
342	107	3	Spring	97	7		Driftnet		1	100
343	107	3	Spring	102	8.4		Driftnet	1
344	107	3	Spring	100	7.6	♀	Trolling net	1
345	107	3	Spring	106	10.6	♂	Trolling net	1
346	107	3	Spring	108.5	10.8	♂	Trolling net	1
347	107	3	Spring	104	8	♀	Trolling net		1	10
348	107	3	Spring	99	8.4	♂	Longline	1
349	107	3	Spring	99	8	♀	Longline		1	10
350	107	3	Spring	96	7.7	♀	Longline										1	25
351	107	3	Spring	97	7.3	♀	Longline										1	10
352	107	3	Spring	92	8.8	♂	Longline				1	9
353	107	3	Spring	97	7.3	♀	Longline	1
354	107	3	Spring	105	7.1	♀	Longline	1
355	107	3	Spring	96	7.2	♀	Driftnet										1	35
356	107	3	Spring	98.5	7.1	♀	Driftnet		1	70
357	107	3	Spring	101	7.7	♀	Driftnet				1	5
358	107	3	Spring	99	7.7	♀	Driftnet	1
359	107	3	Spring	95	7.1	♀	Driftnet	1
360	107	3	Spring	92	6.9	♂	Driftnet	1
361	107	3	Spring	92	6.2	♂	Driftnet		1	5
362	107	3	Spring	96.5	6.4	♀	Driftnet	1
363	107	3	Spring	94.5	6.8	♀	Driftnet										1	40
364	107	3	Spring	94	6.4	♂	Driftnet	1
365	107	3	Spring	89.5	6.4	♂	Trolling net	1
366	107	3	Spring	95.5	6.5	♀	Driftnet		1	25
367	107	3	Spring	88.5	5.8	♀	Trolling net	1
368	107	3	Spring	90	6.9		Driftnet	1
369	107	3	Spring	129	17.4	♀	Longline	1
370	107	3	Spring	109	10.5	♂	Driftnet	1
371	107	3	Spring	113	10.6	♂	Trolling net	1
372	107	3	Spring	105.5	9.1	♀	Driftnet	1
373	107	3	Spring	106	8.5	♂	Driftnet	1
374	107	3	Spring	91	6	♂	Driftnet	1
375	107	3	Spring	113	10.6	♀	Driftnet	1
376	107	3	Spring	99	8	♂	Driftnet	1
377	107	3	Spring	103	8.1	♂	Driftnet	1
378	107	3	Spring	100.5	8.2	♂	Driftnet																1	10
379	107	3	Spring	102.5	7.5	♀	Driftnet	1
380	107	3	Spring	94.5	7	♀	Driftnet	1
381	107	3	Spring	101	8.6	♀	Driftnet	1
382	107	3	Spring	113	10.7	♀	Driftnet	1
383	107	3	Spring	110.5	10.7	♀	Driftnet		1	10
384	107	3	Spring	100.5	7.6	♀	Driftnet	1
385	107	3	Spring	105	8.5	♀	Driftnet										1	20
386	107	3	Spring	101.5	8.7	♀	Driftnet	1
387	107	3	Spring	111	10.8	♀	Driftnet		1	220
388	107	3	Spring	104	8.5	♀	Longline	1
389	107	3	Spring	96	7	♀	Longline										3	30
390	107	3	Spring	95	6.6	♂	Longline		1	10
391	107	3	Spring	96	7	♀	Longline		1	15
392	107	3	Spring	111	11.7	♀	Driftnet		1	16.58
393	107	3	Spring	113	11.1	♂	Longline	1
394	107	3	Spring	112	11	♀	Longline	1
395	107	3	Spring	112	11.4	♀	Longline		1	20.86
396	107	3	Spring	97.5	7.3		Longline	1
397	107	3	Spring	102	7.6		Longline	1
398	107	3	Spring	90	6.1	♀	Longline	1
399	107	3	Spring	92.5	6	♂	Trolling net	1
400	107	3	Spring	95.5	6.6		Trolling net	1
401	107	3	Spring	96.5	6.7		Trolling net	1
402	107	3	Spring	111	10.5		Longline	1
403	107	3	Spring	110	9.7	♂	Longline	1
404	107	3	Spring	91.5	6		Trolling net	1
405	107	3	Spring	93.5	5.8	♀	Trolling net	1
406	107	3	Spring	93.5	5.8	♀	Trolling net	1
407	107	3	Spring	114	11.1		Longline	1
408	107	3	Spring	113	11.7	♂	Longline	1
409	107	3	Spring	98	8.3	♀	Longline	1
410	107	3	Spring	94.5	7	♂	Longline		1	44.93
411	107	3	Spring	96	7.1	♀	Longline	1
412	107	3	Spring	103	8.3		Longline	1
413	107	3	Spring	101	8.2	♂	Longline	1
414	107	3	Spring	95.5	7	♀	Longline		1	28.5
415	107	3	Spring	96	7.5	♀	Driftnet	1
416	107	3	Spring	93.5	6.6	♀	Driftnet	1
417	107	3	Spring	88.5	6.2	♂	Trolling net	1
418	107	3	Spring	88	6.1	♂	Trolling net	1
419	107	3	Spring	89.5	6.2	♀	Longline	1
420	107	3	Spring	88.5	6.1	♀	Longline		1	5.03
421	107	3	Spring	89.5	5.9	♂	Longline	1
422	107	3	Spring	89	6		Longline	1
423	107	3	Spring	90.5	6.1	♀	Driftnet	1
424	107	3	Spring	89	6.3	♂	Longline	1
425	107	3	Spring	92.5	6		Driftnet	1
426	107	3	Spring	90	6		Driftnet	1
427	107	3	Spring	85.5	5		Longline	1
428	107	3	Spring	90.5	5.8	♀	Driftnet	1
429	107	3	Spring	92	5.8	♀	Driftnet	1
430	107	3	Spring	98.5	7.9	♀	Driftnet	1
431	107	3	Spring	85.5	5.7		Driftnet	1
432	107	3	Spring	91	6	♂	Driftnet	1
433	107	3	Spring	93	5.7		Driftnet	1
434	107	3	Spring	96.5	6.8		Driftnet	1
435	107	3	Spring	87.5	10.7		Driftnet	1
436	107	3	Spring	92	6.1		Driftnet	1
437	107	3	Spring	104	8.5		Longline	1
438	107	3	Spring	99.5	8.2	♂	Longline		1	15.43
439	107	3	Spring	91.5	6.8	♀	Longline		1	12.02
440	107	3	Spring	95	6.6		Longline	1
441	107	3	Spring	91.5	6		Longline	1
442	107	3	Spring	93	6.6		Longline	1
443	107	3	Spring	95.5	6.5		Longline	1
444	107	3	Spring	96	7	♂	Longline	1
445	107	3	Spring	95	6.8	♀	Longline		1	17.66
446	107	3	Spring	117	12.9	♀	Trolling net	1
447	107	4	Spring	114.5	10.8	♀	Trolling net	1
448	107	4	Spring	114	10.2	♂	Trolling net	1
449	107	4	Spring	113	10.2	♀	Trolling net	1
450	107	4	Spring	114.5	10.4		Trolling net	1
451	107	4	Spring	95	6	♂	Longline	1
452	107	4	Spring	109	10.3	♀	Trolling net	1
453	107	4	Spring	108	9.8	♂	Trolling net	1
454	107	4	Spring	107	9.8	♂	Trolling net	1
455	107	4	Spring	108	9.4	♂	Trolling net	1
456	107	4	Spring	106	9.6	♂	Trolling net	1
457	107	4	Spring	106	9.5	♂	Trolling net	1
458	107	4	Spring	109.5	10.5	♂	Trolling net	1
459	107	4	Spring	110	10.3	♀	Longline	1
460	107	4	Spring	109	10.1	♂	Longline	1
461	107	4	Spring	92.5	6.6	♂	Longline	1
462	107	5	Summer	121	14	♀	Driftnet	1
463	107	5	Summer	119	12.5	♂	Driftnet	1
464	107	6	Summer	115	9.3	♀	Driftnet		1	40
465	107	7	Summer	38.3	0.475		light fishery		1	4.85
466	107	7	Summer	35	0.353		light fishery	1
467	107	7	Summer	37.5	0.456		light fishery				1	6
468	107	7	Summer	38.5	0.447		light fishery				1	2.75
469	107	7	Summer	38.5	0.477		light fishery	1
470	107	7	Summer	40.5	0.512		Trawling net	1
471	107	7	Summer	39	0.489		light fishery		1	9.37
472	107	7	Summer	38.5	0.472		light fishery				1	1.5
473	107	7	Summer	25.5	0.155		light fishery												3	5.27
474	107	7	Summer	25	0.152		light fishery												2	8.06
475	107	7	Summer	21.5	0.098		light fishery												2	4.03
476	107	7	Summer	22.5	0.126		light fishery												4	11.88
477	107	7	Summer	21.5	0.988		light fishery	1
478	107	7	Summer	22.5	0.108		light fishery												3	11.91
479	107	9	Autumn	101	8.5	♂	Driftnet	1
480	107	9	Autumn	49	0.93	♀	Trawling net	1
481	107	9	Autumn	49.5	1.02	♀	Trawling net	1
482	107	9	Autumn	45.5	0.78	♂	Trawling net	1
483	107	9	Autumn	46.5	0.9	♂	Trawling net												1	11.76
484	107	9	Autumn	91	6.4	♂	Driftnet	1
485	107	9	Autumn	89	5.4	♀	Driftnet	1
486	107	9	Autumn	79	3.8	♂	Driftnet	1
487	107	9	Autumn	79	3.6	♂	Driftnet	1
488	107	9	Autumn	116	12.9	♀	Trolling net		1	30.48
489	107	10	Autumn	93	6.4	♀	Driftnet				1	15
490	107	10	Autumn	96	7.4		Longline	1
491	107	10	Autumn	99	7.9		Longline	1
492	107	10	Autumn	103	7.9		Longline	1
493	107	10	Autumn	97.5	6.7	♀	Longline	1
494	107	10	Autumn	96	6.9	♂	Longline	1
495	107	10	Autumn	97.5	7.2	♂	Longline				1	5
496	107	10	Autumn	94	6.8	♂	Driftnet	1				5
497	107	10	Autumn	94	6.6	♀	Driftnet				1	100
498	107	10	Autumn	91.5	6.2	♀	Driftnet				1	50
499	107	10	Autumn	93	6.2	♀	Driftnet	1
500	107	10	Autumn	96.5	7.3	♀	Driftnet	1
501	107	10	Autumn	93	6.2	♀	Driftnet				1	5
502	107	10	Autumn	105	9.4	♀	Driftnet				1	19.29
503	107	10	Autumn	102	9.2	♂	Trolling net				1	62.24
504	107	10	Autumn	101	8		Trolling net	1
505	107	10	Autumn	94	7.2		Trolling net		1	103.29
506	107	10	Autumn	95	6.6		Driftnet				1	57.79
507	107	10	Autumn	89	6	♀	Driftnet		1	65
508	107	10	Autumn	95	7.2	♀	Driftnet	1
509	107	10	Autumn	90	5.2	♀	Driftnet	1
510	107	10	Autumn	81	4.1	♂	Driftnet	1
511	107	10	Autumn	85	4.4	♀	Driftnet	1
512	107	10	Autumn	81	4.5	♂	Driftnet	1
513	107	10	Autumn	110	9.4	♀	Driftnet	1
514	107	10	Autumn	93	6.6	♀	Driftnet		1	41.3
515	107	10	Autumn	88	6.1	♀	Longline	1
516	107	10	Autumn	106	9.7	♂	Trolling net	1
517	107	10	Autumn	103	8.6		Trolling net	1
518	107	10	Autumn	100	8.4		Longline	1
519	107	10	Autumn	97	8.7	♀	Longline	1
520	107	10	Autumn	99	8.5		Driftnet	1
521	107	10	Autumn	101	8.2		Longline		1	7.66
522	107	10	Autumn	96	8.7		Driftnet	1
523	107	10	Autumn	96.5	7.6	♀	Driftnet	1
524	107	10	Autumn	104	10.4	♀	Driftnet	1
525	107	10	Autumn	92.5	7		Driftnet	1
526	107	10	Autumn	93	6.6	♂	Driftnet	1
527	107	10	Autumn	91	6.5		Driftnet				1	17.34
528	107	10	Autumn	87	5.8		Longline	1
529	107	10	Autumn	92	5.9		Driftnet	1
530	107	10	Autumn	87	5.5		Longline	1
531	107	10	Autumn	88	5.7		Longline	1
532	107	10	Autumn	90	5.9		Driftnet				1	8.79
533	107	10	Autumn	91	6.2		Driftnet	1
534	107	10	Autumn	90.5	6		Driftnet	1
535	107	10	Autumn	94	6.4		Driftnet	1
536	107	10	Autumn	124	14.2	♀	Trolling net	1
537	107	10	Autumn	116	13.2	♀	Longline	1
538	107	10	Autumn	130	17	♀	Longline	1
539	107	10	Autumn	97.5	8.2	♀	Driftnet	1
540	107	10	Autumn	95	7.2	♀	Driftnet	1
541	107	10	Autumn	104.5	8.5	♀	Longline	1
542	107	10	Autumn	95	7.2		Longline	1
543	107	10	Autumn	96	7		Longline	1
544	107	10	Autumn	93.5	6.5		Longline	1
545	107	10	Autumn	94	6.6		Longline	1
546	107	10	Autumn	84	5.7		Driftnet	1
547	107	10	Autumn	91	5	♂	Driftnet	1
548	107	10	Autumn	84	5.4		Driftnet	1
549	107	10	Autumn	92	5.9		Driftnet	1
550	107	10	Autumn	102	9.5	♀	Driftnet	1
551	107	11	Winter	84	5.5	♂	Trolling net	1
552	107	11	Winter	93	5.9	♀	Longline	1
553	107	11	Winter	92	5.8	♀	Longline	1
554	107	11	Winter	72	3.2		Trolling net	1
555	107	11	Winter	86.5	5	♂	Driftnet	1
556	107	11	Winter	86	5	♂	Driftnet	1
557	107	11	Winter	88	5.2	♂	Driftnet	1
558	107	11	Winter	93.5	6.2	♀	Longline	1
559	107	12	Winter	97	7.7	♀	Longline														1	60
560	107	12	Winter	95	7	♀	Longline	1
561	107	12	Winter	102.5	8.3	♂	Longline				1	8
562	107	12	Winter	100	8.5	♀	Longline	1
563	107	12	Winter	91	5.5	♀	Longline	1
564	107	12	Winter	90	5.7	♂	Driftnet	1
565	107	12	Winter	93.5	6.3	♀	Driftnet	1
566	107	12	Winter	87	5	♂	Driftnet	1
567	107	12	Winter	87	5.2	♀	Driftnet	1
568	107	12	Winter	87	5.2	♂	Driftnet	1
569	107	12	Winter	80.5	4.8		Driftnet	1
570	107	12	Winter	143	24.3	♀	Longline	1
571	107	12	Winter	103	8.3	♀	Driftnet				1	15.41
572	107	12	Winter	96	7.1	♀	Driftnet				1	44.57
573	107	12	Winter	97	7.3	♀	Driftnet	1
574	107	12	Winter	98	6.8	♂	Driftnet	1
575	107	12	Winter	97	6.9		Driftnet	1
576	107	12	Winter	99	6.8	♀	Driftnet	1
577	107	12	Winter	96	6.5	♀	Driftnet	1
578	107	12	Winter	96	6.8	♂	Driftnet	1
579	107	12	Winter	94	6.9	♂	Driftnet	1
580	107	12	Winter	90	6		Driftnet	1
581	107	12	Winter	89	6.4	♀	Driftnet	1
582	107	12	Winter	89	6.4	♂	Driftnet	1
583	107	12	Winter	90	6.4		Driftnet	1
584	107	12	Winter	87	6.1		Driftnet	1
585	107	12	Winter	88	5.2		Driftnet	1
586	107	12	Winter	86	5.5	♂	Driftnet				1	5.12
587	107	12	Winter	89	5.9	♂	Driftnet				1	6.06
588	107	12	Winter	96	6.9	♂	Driftnet	1
589	107	12	Winter	98	7.3	♂	Driftnet	1
590	107	12	Winter	96	7.1		Driftnet				1	27.03
591	107	12	Winter	92	5.8		Driftnet	1
592	107	12	Winter	87	5.2		Driftnet	1
593	107	12	Winter	90	5.6		Driftnet	1
594	107	12	Winter	93	5.8	♂	Driftnet	1
595	107	12	Winter	85	4.9		Driftnet	1
596	107	12	Winter	100	6.9	♀	Driftnet	1
597	107	12	Winter	99	7.1		Driftnet	1
598	107	12	Winter	97	7.2	♀	Driftnet	1
599	107	12	Winter	101	7.5	♀	Driftnet	1
600	107	12	Winter	94	7.7	♂	Driftnet	1
601	107	12	Winter	113	11.9		Longline	1
602	107	12	Winter	112	11.6	♀	Longline		1	31.61
603	107	12	Winter	113	11.7		Driftnet	1
604	107	12	Winter	110	9.6	♀	Driftnet	1
605	107	12	Winter	94	6.4	♀	Longline	1
606	107	12	Winter	91	6.1	♀	Longline	1
607	107	12	Winter	90	6	♂	Longline				1	5.52
608	107	12	Winter	93	6.4	♂	Longline	1
609	107	12	Winter	93	6.3	♀	Longline	1
610	107	12	Winter	94	6.2	♀	Longline	1
611	107	12	Winter	91	6.1	♀	Longline	1
612	107	12	Winter	92	6.2	♀	Trolling net	1
613	107	12	Winter	113	11.2	♀	Driftnet	1
614	107	12	Winter	113	11.6	♀	Driftnet	1
615	108	1	Winter	108	11		Trolling net														1	23.68
616	108	1	Winter	110	10.7	♀	Driftnet	1
617	108	1	Winter	106	8.7	♀	Trolling net	1
618	108	1	Winter	101	8.6	♀	Trolling net	1
619	108	1	Winter	101	8.3	♀	Trolling net	1
620	108	1	Winter	99	8.5	♀	Longline	1
621	108	1	Winter	97	7.9	♀	Longline	1
622	108	1	Winter	99	7.7	♂	Longline				1	3.67
623	108	1	Winter	98.5	6.9	♂	Longline		1	51.77
624	108	1	Winter	94	7.2	♀	Longline	1
625	108	1	Winter	106	10.2	♀	Longline	1
626	108	1	Winter	90	5.5	♂	Longline	1
627	108	1	Winter	87	5.4	♂	Longline	1
628	108	1	Winter	102	7.2	♀	Longline	1
629	108	1	Winter	98	6.8	♂	Trolling net	1
630	108	1	Winter	96	6.5	♀	Trolling net	1
631	108	1	Winter	98.5	7.1	♂	Trolling net	1
632	108	1	Winter	99	7.2	♀	Trolling net	1
633	108	1	Winter	98.5	7.1	♀	Trolling net				1	0.94
634	108	1	Winter	99	8.4	♀	Trolling net	1
635	108	1	Winter	98	7.3	♂	Trolling net	1
636	108	1	Winter	91	7.4	♀	Driftnet	1
637	108	1	Winter	97	7.4	♂	Driftnet	1
638	108	1	Winter	98	7.1	♀	Driftnet				1	25.456
639	108	1	Winter	97	7	♀	Driftnet	1
640	108	1	Winter	104.5	8.6	♀	Driftnet	1
641	108	1	Winter	94	6.7	♀	Driftnet	1
642	108	1	Winter	103	8.7		Driftnet	1
643	108	1	Winter	92	6.1	♂	Driftnet	1
644	108	1	Winter	90	6.4	♂	Driftnet	1
645	108	1	Winter	92	6.2		Driftnet	1
646	108	1	Winter	92	6.7		Driftnet	1
647	108	1	Winter	95	6.7	♀	Driftnet	1
648	108	1	Winter	93	6.5	♂	Driftnet	1
649	108	1	Winter	90	6.2	♂	Driftnet	1
650	108	1	Winter	93	7.2		Driftnet	1
651	108	1	Winter	87	5.8	♀	Longline	1
652	108	2	Spring	123	15.3	♀	Trolling net	1
653	108	2	Spring	124	14.8	♀	Trolling net	1
654	108	3	Spring	109	11.2	♂	Longline	1
655	108	3	Spring	102	8.6	♂	Longline	1
656	108	3	Spring	119	14	♀	Trolling net	1
657	108	3	Spring	118	10.9	♀	Longline	1
658	108	3	Spring	110	11.1	♂	Driftnet	1
659	108	3	Spring	96	7	♂	Longline	1
660	108	3	Spring	97	7.2	♂	Longline	1
661	108	3	Spring	107	10.8		Driftnet	1
662	108	3	Spring	116.5	13.2	♀	Driftnet	1
663	108	3	Spring	120	12.9	♂	Trolling net	1
664	108	3	Spring	107	11.2	♂	Driftnet	1
665	108	3	Spring	129	14.6	♀	Longline	1
666	108	4	Spring	134	17.7	♀	Longline	1
667	108	4	Spring	159	27	♀	Longline	1
668	108	5	Summer	95	6.3		Driftnet	1
669	108	5	Summer	83	4.9		Trolling net	1
670	108	5	Summer	82	4.7		Trolling net	1
671	108	5	Summer	75.5	3.3	♂	Trolling net	1
672	108	5	Summer	142.5	22.3	♀	Longline	1
673	108	5	Summer	142	23.8	♀	Longline	1
674	108	6	Summer	129.5	14.5	♀	Longline	1
675	108	6	Summer	111	10	♀	Trolling net		1	20
676	108	6	Summer	135	17.8	♂	Longline	1
677	108	7	Summer	137	20.9	♀	Longline		1	110
678	108	10	Autumn	81	4	♀	Driftnet	1
679	108	10	Autumn	78	3.8	♀	Driftnet	1
680	108	10	Autumn	77	3.7	♀	Driftnet	1
681	108	10	Autumn	83	4.3		Driftnet	1
682	108	10	Autumn	82	4.8	♀	Driftnet	1
683	108	10	Autumn	83	5.3		Driftnet	1
684	108	10	Autumn	47.5	0.95		Trawling net				1	4.8
685	108	10	Autumn	46	0.9		Trawling net				1	21.8
686	108	10	Autumn	93	7	♀	Driftnet				1	5.67
687	108	10	Autumn	98	7.5		Driftnet	1
688	108	10	Autumn	97	7	♀	Driftnet	1
689	108	10	Autumn	94	7		Driftnet	1
690	108	10	Autumn	93	6.3		Driftnet	1
691	108	10	Autumn	88.5	5.6		Longline				1	63.83											1	11.58
692	108	10	Autumn	85	5.1	♂	Longline	1
693	108	10	Autumn	86	8.6	♂	Longline	1
694	108	10	Autumn	104.5	9.3		Driftnet				1	26.02																											1	77.43
695	108	10	Autumn	108	10	♀	Driftnet				1	12.54	1	40.94													1	0.6
696	108	10	Autumn	103	8.4	♀	Driftnet	1
697	108	10	Autumn	89	6	♀	Driftnet	1
698	108	10	Autumn	95	6.4	♀	Driftnet																												1	36.24
699	108	10	Autumn	97	6	♀	Driftnet		1	17.12									1	36.21
700	108	10	Autumn	94.5	6.2	♀	Driftnet	1
701	108	10	Autumn	93	6.1	♂	Driftnet	1
702	108	10	Autumn	93	5.4		Driftnet																1	14
703	108	11	Winter	94	6	♀	Driftnet	1
704	108	11	Winter	107.5	10		Trolling net		1	7.53
705	108	11	Winter	91	6.6		Driftnet																1	24.88
706	108	11	Winter	89	5.6		Longline		1	5.22
707	108	11	Winter	96	7.5		Driftnet				1	21.06											1	24.42
708	108	11	Winter	95	7		Driftnet																1	2.6
709	108	11	Winter	90	6.1		Driftnet				1	13.98											1	32.75
710	108	11	Winter	90	5.9		Driftnet				1	41.47
711	108	11	Winter	87.5	5.8		Driftnet				1	3.86											1	20.91
712	108	11	Winter	96	6.4		Driftnet																1	5.11
713	108	11	Winter	97	6.9		Driftnet				1	11.81											1	2.31
714	108	11	Winter	102	7.3		Driftnet				1	8.4
715	108	11	Winter	100	7.6		Driftnet				1	10.64
716	108	11	Winter	96	6.3		Driftnet		1	79.31
717	108	11	Winter	88	5.9		Driftnet				1	8.27
718	108	11	Winter	86	5.37		Driftnet		1	24.48	1	11.67
719	108	11	Winter	88.5	6		Driftnet	1
720	108	11	Winter	90.5	6		Driftnet	1
721	108	11	Winter	94	6		Driftnet	1
722	108	11	Winter	89.5	5.7		Driftnet	1
723	108	11	Winter	88	6.2		Driftnet	1
724	108	11	Winter	86	5.2		Driftnet	1
725	108	11	Winter	87.5	5.5		Driftnet	1
726	108	11	Winter	84	5.3		Driftnet	1
727	108	11	Winter	82	4.4		Driftnet	1
728	108	11	Winter	89	5.6		Driftnet	1
729	108	11	Winter	91	6.6		Driftnet	1
730	108	12	Winter	100.5	10.1	♂	Driftnet	1
731	108	12	Winter	93.5	7	♀	Driftnet																1	2.91
732	108	12	Winter	96.5	6.8		Driftnet				1	4.32
733	108	12	Winter	95	6.5		Driftnet				1	0.67
734	108	12	Winter	90.5	6.3	♀	Driftnet	1
735	108	12	Winter	93	6.1		Longline				1	18.85
736	108	12	Winter	92	6.1		Longline	1
737	108	12	Winter	88	5.7		Longline	1
738	108	12	Winter	89	6.1		Longline	1
739	108	12	Winter	92	6.5		Longline	1
740	108	12	Winter	88	5.9		Driftnet	1
741	108	12	Winter	90	6		Longline	1
742	108	12	Winter	106	9		Longline				1	17.95
743	108	12	Winter	98.5	8		Longline	1
744	108	12	Winter	97	8.2		Longline				1	30.75
745	108	12	Winter	94	7.2		Longline	1
746	108	12	Winter	100	7.3		Longline				1	2.04
747	108	12	Winter	86	4.7		Driftnet				1	21.97
748	108	12	Winter	85.5	4.7		Longline	1
749	108	12	Winter	83	4.7		Driftnet				1	13.51
750	108	12	Winter	94	6.6		Trolling net	1
751	108	12	Winter	98	7.9		Trolling net	1
752	108	12	Winter	89.5	6.5		Driftnet	1
753	108	12	Winter	89	6.2		Driftnet	1
754	108	12	Winter	87.5	5.8		Driftnet	1
755	108	12	Winter	84.5	5.7		Longline	1
756	108	12	Winter	89	6.1		Longline	1
757	108	12	Winter	95	6.6		Trolling net	1
758	108	12	Winter	101	8.2	♀	Trolling net	1
759	108	12	Winter	99	7.7	♂	Longline	1
760	108	12	Winter	96.5	7.6		Longline	1
761	108	12	Winter	95.5	6.8		Longline	1
762	108	12	Winter	89	6.5		Longline	1
763	108	12	Winter	93.5	6.5		Longline				1	41.6
764	108	12	Winter	93.5	7		Longline	1
765	108	12	Winter	109	10.4		Longline	1
766	108	12	Winter	106	9.8		Longline	1
767	108	12	Winter	111	10.6		Driftnet	1
768	108	12	Winter	90	5.4		Longline	1
769	108	12	Winter	101.5	7.7		Driftnet	1
770	108	12	Winter	94	7.8		Driftnet	1
771	108	12	Winter	81	4.2	♂	Longline														1	89.6
772	108	12	Winter	85	5.5	♂	Driftnet	1
773	108	12	Winter	96	7.4	♀	Driftnet	1
774	108	12	Winter	87	5.7	♀	Driftnet	1
775	108	12	Winter	84	5.2	♂	Driftnet	1
776	108	12	Winter	93	7	♀	Driftnet	1
777	108	12	Winter	88	6.2	♀	Driftnet	1
778	108	12	Winter	88	6	♀	Driftnet	1
779	108	12	Winter	86	5.3		Driftnet	1
780	108	12	Winter	91.5	5.6	♂	Driftnet				1	22.17															1	0.33
781	108	12	Winter	88	5.2		Longline	1
782	108	12	Winter	90	5		Driftnet	1
783	108	12	Winter	86.5	4.8		Longline	1
784	108	12	Winter	85.5	4.8	♀	Trolling net		1	38.07	1	11.89
785	108	12	Winter	84.5	4.3	♀	Trolling net	1
786	109	1	Winter	88	4.9	♀	Trolling net	1
787	109	1	Winter	84	5	♂	Trolling net	1
788	109	1	Winter	89	5.6	♂	Trolling net	1
789	109	1	Winter	91	5.4		Driftnet	1
790	109	1	Winter	93	5.5		Driftnet	1
791	109	1	Winter	92	5.9	♂	Driftnet				1	27.63
792	109	1	Winter	85	5	♀	Trolling net	1
793	109	1	Winter	104	9		Driftnet	1
794	109	1	Winter	102	8.1		Driftnet	1
795	109	1	Winter	96	7.9		Driftnet	1
796	109	1	Winter	94	7.1		Driftnet	1
797	109	1	Winter	96	7.1		Driftnet	1
798	109	1	Winter	96	7.4		Driftnet	1
799	109	1	Winter	97	6.2		Driftnet	1
800	109	1	Winter	92	6.9		Driftnet	1
801	109	1	Winter	92	5.9		Driftnet	1
802	109	1	Winter	88	5.3		Longline	1
803	109	1	Winter	86	5.5	♂	Longline	1
804	109	1	Winter	92	6.2	♂	Driftnet	1
805	109	1	Winter	85	5	♂	Longline	1
806	109	1	Winter	87	5.5	♀	Longline	1
807	109	1	Winter	85	5.2	♂	Driftnet	1
808	109	1	Winter	92	5.9	♀	Driftnet	1
809	109	1	Winter	90	5.7	♂	Driftnet	1
810	109	1	Winter	92	6.5	♂	Driftnet	1
811	109	1	Winter	95	6.5	♀	Driftnet	1
812	109	1	Winter	100	8.1		Driftnet	1
813	109	1	Winter	100	8.8		Driftnet	1
814	109	1	Winter	99	8.2		Driftnet	1
815	109	1	Winter	95	7.5		Driftnet	1
816	109	1	Winter	93	7.5		Driftnet	1
817	109	1	Winter	94	7.6		Driftnet	1
818	109	1	Winter	92	5.7		Driftnet	1
819	109	2	Spring	90	5.1	♂	Driftnet				1	6.8
820	109	2	Spring	94	6.1	♀	Driftnet	1
821	109	2	Spring	92	5.4	♂	Driftnet				1	11.12
822	109	2	Spring	89	5.2	♂	Driftnet				1	5.44
823	109	2	Spring	114	11.9	♀	Trolling net	1
824	109	2	Spring	87.5	5.9		Driftnet	1
825	109	2	Spring	90.5	5.8		Driftnet	1
826	109	2	Spring	90	5.7	♂	Driftnet	1
827	109	2	Spring	90	6		Driftnet				1	7.28
828	109	2	Spring	89	6.2		Driftnet	1
829	109	2	Spring	90.5	6.2		Driftnet	1
830	109	2	Spring	91.5	6		Driftnet	1
831	109	2	Spring	93	6.6	♂	Driftnet	1
832	109	2	Spring	94.5	6.5		Driftnet	1
833	109	2	Spring	91	6.4		Driftnet	1
834	109	2	Spring	93	6.5		Driftnet	1
835	109	2	Spring	92	6.3		Driftnet	1
836	109	2	Spring	99.5	7		Driftnet	1
837	109	2	Spring	97.5	7.4		Driftnet	1
838	109	2	Spring	99	7.6		Driftnet	1
839	109	2	Spring	98	7.8		Driftnet	1
840	109	2	Spring	98.5	7.9	♂	Driftnet	1
841	109	2	Spring	94	7.8		Driftnet	1
842	109	2	Spring	100.5	8.2	♀	Driftnet				1	24.11
843	109	2	Spring	115	11.5		Trolling net	1
844	109	2	Spring	114	11.7		Trolling net	1
845	109	2	Spring	111	11	♀	Driftnet	1
846	109	2	Spring	92	6.4	♂	Driftnet	1
847	109	2	Spring	94.5	7.5	♀	Driftnet				1	16.05
848	109	2	Spring	118.5	12.3	♀	Driftnet		1	107.9
849	109	2	Spring	111	10.8		Driftnet	1
850	109	2	Spring	112.5	11.1		Driftnet	1
851	109	2	Spring	121.5	14	♀	Driftnet	1
852	109	2	Spring	89.5	5.9		Driftnet	1
853	109	2	Spring	111	10.8		Driftnet	1
854	109	2	Spring	102.5	8.4		Driftnet	1
855	109	2	Spring	102	8.4		Driftnet	1
856	109	2	Spring	104.5	8		Driftnet	1
857	109	2	Spring	108	9		Driftnet	1
858	109	2	Spring	100	8		Driftnet	1
859	109	2	Spring	95	7.2		Driftnet	1
860	109	2	Spring	95.5	7		Driftnet	1
861	109	2	Spring	98.5	7.2		Trolling net	1
862	109	2	Spring	94	7.1		Trolling net	1
863	109	2	Spring	94.5	7.1		Trolling net	1
864	109	2	Spring	97.5	6.9		Trolling net	1
865	109	2	Spring	94	6.6		Trolling net	1
866	109	2	Spring	95	6.7		Trolling net	1
867	109	2	Spring	96	6.6		Trolling net	1
868	109	2	Spring	96.5	6.9		Longline	1
869	109	2	Spring	88	6.3		Driftnet	1
870	109	2	Spring	92.5	6.6		Longline	1
871	109	2	Spring	92.5	6.4		Longline	1
872	109	2	Spring	93	6.4		Longline	1
873	109	2	Spring	88.5	6		Driftnet	1
874	109	2	Spring	96	6.5		Longline	1
875	109	2	Spring	93	6		Longline	1
876	109	2	Spring	95	6.5	♀	Longline	1
877	109	2	Spring	96	6.5	♀	Longline	1
878	109	2	Spring	87	5.3	♀	Driftnet	1
879	109	2	Spring	88	5.6	♂	Driftnet	1
880	109	2	Spring	86	5	♂	Driftnet	1
881	109	2	Spring	93.5	5.8	♀	Longline				1	40.24
882	109	2	Spring	93.5	6.2	♀	Longline	1
883	109	2	Spring	94	6.2	♀	Longline	1
884	109	3	Spring	112	10.9		Longline	1
885	109	3	Spring	110	10.3	♀	Longline				1	43.86											1	2.72
886	109	3	Spring	110.5	12.7	♀	Longline	1
887	109	3	Spring	112	10.7	♀	Longline	1
888	109	3	Spring	117	13.1	♀	Longline	1
889	109	3	Spring	101	7.8	♀	Longline	1
890	109	3	Spring	98.5	7	♀	Driftnet				1	1.53
891	109	3	Spring	101	7.3	♀	Driftnet				1	4.83											1	1.39
892	109	3	Spring	105	7.9	♀	Driftnet	1
893	109	4	Spring	102.3	7.92	♀	Driftnet		1	64.68
894	109	5	Summer	135	19.4	♀	Longline	1
895	109	5	Summer	128	17.3	♀	Longline	1
896	109	5	Summer	96	6.5	♀	Driftnet	1
897	109	5	Summer	118	12.5	♂	Longline	1
898	109	5	Summer	86	6	♂	Longline	1
899	109	6	Summer	86	4.2		Longline	1
900	109	6	Summer	83	4		Longline	1
901	109	6	Summer	83	4.2		Longline	1
902	109	6	Summer	81	4.1		Longline	1
903	109	6	Summer	90	5.6		Driftnet	1
904	109	6	Summer	94	5.8		Driftnet	1
905	109	8	Autumn	139	17.8	♀	Longline	1
906	109	8	Autumn	120	14.1	♀	Trolling net				1	23.07
907	109	9	Autumn	101	8	♀	Driftnet	1
908	109	9	Autumn	112	10.5		Longline	1
909	109	9	Autumn	109	10.4		Driftnet	1
910	109	9	Autumn	137	19.6	♀	Longline	1
911	109	9	Autumn	91	6.03		Driftnet	1
912	109	9	Autumn	90	5.7		Driftnet	1
913	109	9	Autumn	86	5.73	♂	Driftnet	1
914	109	9	Autumn	86	5.41	♀	Driftnet	1
915	109	9	Autumn	56.5	1.56		Trolling net				1	6.54
916	109	10	Autumn	55.2	1.3	♂	longline				1	1.89													1	0.85
917	109	10	Autumn	56.3	1.4	♀	longline														1	92.04
918	109	10	Autumn	49	1.1	♀	Trawling net				1	11.66
919	109	10	Autumn	43	0.6	♂	Trawling net	1
920	109	10	Autumn	52.1	1	♂	Trolling net	1
921	109	10	Autumn	54	1.3	♀	Trolling net														1	68.7
922	109	10	Autumn	47.2	0.87	♀	Trawling net	1
923	109	10	Autumn	43.4	0.63	♀	Trawling net	1
924	109	10	Autumn	44.4	0.7	♀	Trawling net																				1	0.26
925	109	11	Winter	101	7.9		Driftnet	1
926	109	11	Winter	100	7.4	♀	Driftnet	1
927	109	11	Winter	98	7.4	♀	Driftnet	1
928	109	11	Winter	95	7.4	♀	Driftnet	1
929	109	11	Winter	97	7.2	♀	Driftnet	1
930	109	11	Winter	96	7.4		Trolling net	1
931	109	11	Winter	98	7.6	♀	Trolling net	1
932	109	11	Winter	99	7.2		Trolling net	1
933	109	11	Winter	95	7		Trolling net	1
934	109	11	Winter	94	7		Trolling net	1
935	109	11	Winter	98	7.2		Trolling net	1
936	109	11	Winter	93	6.9	♂	Trolling net	1
937	109	11	Winter	92	5.9		Driftnet	1
938	109	11	Winter	95	6.6	♀	Driftnet	1
939	109	11	Winter	90.5	5.9	♂	Driftnet	1
940	109	11	Winter	91	5.9	♂	Driftnet	1
941	109	11	Winter	90	5.9	♀	Driftnet	1
942	109	11	Winter	97	6	♂	Driftnet				1	4.18
943	109	11	Winter	94	6.6		Driftnet	1
944	109	11	Winter	93	6.6		Driftnet	1
945	109	11	Winter	94	6.1	♀	Driftnet	1
946	109	11	Winter	93	6.4		Driftnet	1
947	109	11	Winter	97	6.9	♀	Driftnet	1
948	109	11	Winter	94	6.4	♀	Driftnet	1
949	109	11	Winter	93	6.2	♂	Driftnet				1	8.99
950	109	11	Winter	95	7.3		Driftnet	1
951	109	11	Winter	97	6.8		Driftnet	1
952	109	11	Winter	100	7.7		Driftnet	1
953	109	11	Winter	99	7.7		Driftnet	1
954	109	11	Winter	98	7.8		Driftnet	1
955	109	11	Winter	92	5.93		Driftnet	1
956	109	11	Winter	91	5.85		Driftnet	1
957	109	11	Winter	93	6.32		Driftnet	1
958	109	11	Winter	91	6.13		Driftnet	1
959	109	11	Winter	97	6.88		Driftnet	1
960	109	11	Winter	91	5.66		Driftnet	1
961	109	11	Winter	98	7.63		Driftnet	1
962	109	11	Winter	95	8.1		Driftnet	1
963	109	11	Winter	96	7.4		Driftnet	1
964	109	11	Winter	93	7.4		Driftnet	1
965	109	11	Winter	92	7.4		Driftnet	1
966	109	11	Winter	93	7.25		Driftnet	1
967	109	11	Winter	88	5		Driftnet	1
968	109	11	Winter	91			Driftnet	1
969	109	11	Winter	105	9.4	♀	Driftnet	1
970	109	11	Winter	92	6.1	♂	Driftnet	1
971	109	11	Winter	91.5	6.3	♂	Driftnet	1
972	109	11	Winter	97	6.9	♀	Longline				1	0.89
973	109	11	Winter	99	7.2	♀	Longline	1
974	109	11	Winter	93	7	♀	Longline	1
975	109	11	Winter	92	7.3	♀	Longline				1	2.54
976	109	11	Winter	99.5	7.7	♀	Longline	1
977	109	11	Winter	113	12.3		Longline	1
978	109	11	Winter	92	6.9	♀	Driftnet	1
979	109	11	Winter	92	6.3	♀	Driftnet	1
980	109	11	Winter	97	7.1		Driftnet	1
981	109	11	Winter	97	7.1		Driftnet	1
982	109	12	Winter	95	7.4	♀	Driftnet	1
983	109	12	Winter	94	7.2	♀	Driftnet	1
984	109	12	Winter	96	7.2	♀	Trolling net																						1	67.89
985	109	12	Winter	107	9.5	♂	Trolling net	1
986	109	12	Winter	105	10.1	♂	Trolling net														1	79.03
987	109	12	Winter	101	8.1	♀	Trolling net	1
988	109	12	Winter	102	8.2	♀	Trolling net	1
989	109	12	Winter	96	7.9	♀	Driftnet	1
990	109	12	Winter	95	7	♀	Driftnet	1
991	109	12	Winter	92	6	♀	Driftnet	1
992	109	12	Winter	85	5.3	♂	Driftnet	1
993	109	12	Winter	91	5.8	♂	Driftnet				1	11.82
994	109	12	Winter	97.5	7	♀	Driftnet	1
995	109	12	Winter	96	6.3	♀	Driftnet	1
996	109	12	Winter	95	6.4	♂	Driftnet				1	65.31
997	109	12	Winter	91	6	♂	Driftnet	1
998	109	12	Winter	96	6.8	♂	Driftnet	1
999	109	12	Winter	98	7.4	♀	Driftnet	1
1000	109	12	Winter	94	7.1	♀	Driftnet				1	27.04
1001	109	12	Winter	98	8.3	♀	Driftnet				1	82.33
1002	109	12	Winter	93	5	♀	Driftnet	1
1003	109	12	Winter	90	5.8		Driftnet	1
1004	109	12	Winter	82	5.8	♂	Driftnet	1
1005	109	12	Winter	110	11.9		Longline	1
1006	109	12	Winter	108.5	11.8	♂	Driftnet				1	120.85
1007	109	12	Winter	91.5	6.4	♀	Driftnet	1
1008	109	12	Winter	91	5.72	♀	Driftnet				1	8.2
1009	109	12	Winter	92	5.8	♂	Longline	1
1010	109	12	Winter	92	5.9	♀	Longline				1	3.44
1011	109	12	Winter	87	5.2	♂	Driftnet				1	3.67
1012	110	1	Winter	88	6.2		Longline	1
1013	110	1	Winter	100.5	7.5		Longline	1
1014	110	1	Winter	108	10.2	♂	Longline	1
1015	110	1	Winter	104	9.5	♀	Longline	1
1016	110	1	Winter	102	9.1		Longline	1
1017	110	1	Winter	103	7.5		Longline	1
1018	110	1	Winter	89	7	♂	Longline	1
1019	110	1	Winter	96	6.9	♀	Longline	1
1020	110	1	Winter	94	6.7		Longline	1
1021	110	1	Winter	94	6.5		Longline	1
1022	110	1	Winter	94	6.5		Longline	1
1023	110	1	Winter	91.5	6.5		Longline	1
1024	110	1	Winter	91	6.4		Longline	1
1025	110	1	Winter	90	6.4	♂	Longline	1
1026	110	1	Winter	91	6.1	♀	Longline	1
1027	110	1	Winter	87	6	♂	Longline	1
1028	110	1	Winter	98.85	7.6	♀	Driftnet	1
1029	110	1	Winter	93	6.2	♂	Driftnet	1
1030	110	1	Winter	94	6.3	♀	Driftnet	1
1031	110	1	Winter	94	6.5	♀	Driftnet	1
1032	110	1	Winter	96	6.6	♀	Driftnet	1
1033	110	1	Winter	95	6.7	♀	Driftnet				1	8.38
1034	110	1	Winter	94.5	6.5	♂	Trolling net	1
1035	110	1	Winter	94	6.4	♂	Driftnet	1
1036	110	1	Winter	95	6.5	♀	Trolling net	1
1037	110	1	Winter	96	6.9		Longline	1
1038	110	1	Winter	99	7.2		Longline	1
1039	110	1	Winter	101	7.5		Longline	1
1040	110	1	Winter	96	7.4		Longline	1
1041	110	1	Winter	101	7.7		Longline	1
1042	110	1	Winter	96	7.4		Longline	1
1043	110	1	Winter	101	8		Longline	1
1044	110	1	Winter	101	7.8		Longline	1
1045	110	1	Winter	105	9.6	♀	Longline	1
1046	110	1	Winter	129	18.9	♀	Longline	1
1047	110	1	Winter	130	16.8	♀	Longline				1	31.18
1048	110	1	Winter	89	5.7		Longline	1
1049	110	1	Winter	94	6.2		Longline	1
1050	110	1	Winter	92	6.2		Driftnet	1
1051	110	1	Winter	99	7.3		Driftnet	1
1052	110	1	Winter	95	7.3		Driftnet	1
1053	110	1	Winter	99	7.9		Driftnet	1
1054	110	1	Winter	112	10.9		Longline	1
1055	110	1	Winter	101	6.9	♀	Driftnet	1
1056	110	1	Winter	109	10.7	♀	Driftnet	1
1057	110	1	Winter	121	13.57		Longline	1
1058	110	1	Winter	128	17.1	♂	Longline	1
1059	110	1	Winter	94	6.3	♀	Driftnet	1
1060	110	1	Winter	109	11.2	♀	Driftnet	1
1061	110	1	Winter	104	8.6	♀	Driftnet	1
1062	110	1	Winter	91	5.8	♀	Driftnet	1
1063	110	1	Winter	90	5.5	♂	Driftnet	1
1064	110	1	Winter	93	5.4	♀	Driftnet	1
1065	110	1	Winter	99	6.7	♀	Driftnet	1
1066	110	1	Winter	97	7.4	♀	Driftnet	1
1067	110	1	Winter	95	6.2	♀	Driftnet	1
1068	110	1	Winter	92	6.1	♀	Trolling net	1
1069	110	1	Winter	119	13.5	♀	Trolling net	1
1070	110	1	Winter	103	8.7	♂	Trolling net	1
1071	110	1	Winter	106	8.3	♀	Trolling net		1	22.38
1072	110	1	Winter	97	6.8	♀	Trolling net	1
1073	110	1	Winter	102	8.2	♂	Trolling net	1
1074	110	1	Winter	93	7.2	♀	Driftnet	1
1075	110	1	Winter	95	7.1	♀	Driftnet	1
1076	110	1	Winter	105	8.7	♂	Driftnet	1
1077	110	1	Winter	122	13.1	♀	Trolling net	1
1078	110	1	Winter	102	9.4	♀	Driftnet	1
1079	110	1	Winter	103	9.1	♂	Driftnet	1
1080	110	1	Winter	92	5.6		Driftnet	1
1081	110	1	Winter	98	5.1		Driftnet	1
1082	110	1	Winter	93	7.1		Driftnet	1
1083	110	1	Winter	92	6.3		Driftnet	1
1084	110	1	Winter	101	8		Driftnet	1
1085	110	1	Winter	105	9.2		Driftnet	1
1086	110	1	Winter	107	8.8		Trolling net	1
1087	110	1	Winter	107	8.9		Trolling net	1
1088	110	1	Winter	100	8.5	♂	Trolling net	1
1089	110	1	Winter	106	9.2	♂	Trolling net	1
1090	110	1	Winter	107	9.3	♀	Trolling net	1
1091	110	1	Winter	101	9.3	♀	Trolling net	1
1092	110	1	Winter	105	9.4		Trolling net	1
1093	110	1	Winter	102	8		Longline	1
1094	110	1	Winter	105	9.2	♀	Longline	1
1095	110	1	Winter	105	9.4		Longline	1
1096	110	1	Winter	110	11.3		Driftnet	1
1097	110	1	Winter	112	12	♀	Driftnet	1
1098	110	1	Winter	109	11.8	♀	Longline	1
1099	110	1	Winter	116	11.4		Driftnet	1
1100	110	1	Winter	101	8.3		Longline	1
1101	110	1	Winter	130	19.1		Longline	1
1102	110	2	Spring	102	8.7	♀	Driftnet	1
1103	110	2	Spring	103	8	♀	Driftnet	1
1104	110	2	Spring	102	7.6	♀	Driftnet	1
1105	110	2	Spring	91	6		Driftnet	1
1106	110	2	Spring	98	7.2	♂	Driftnet				1	5.15
1107	110	2	Spring	101	7.7	♂	Driftnet	1
1108	110	2	Spring	88	5.2		Longline	1
1109	110	2	Spring	90	5.5	♂	Driftnet	1
1110	110	2	Spring	87	5	♂	Longline	1
1111	110	2	Spring	87	5.5	♂	Longline	1
1112	110	2	Spring	89	4.52		Longline	1
1113	110	2	Spring	83	4.29		Longline	1
1114	110	2	Spring	110	9.8	♀	Longline	1
1115	110	2	Spring	105	9.4	♂	Driftnet	1
1116	110	2	Spring	105	9.5		Driftnet	1
1117	110	2	Spring	95	9	♀	Driftnet				1	4.89
1118	110	2	Spring	105	9.6	♀	Driftnet	1
1119	110	2	Spring	128	16.4	♀	Longline	1
1120	110	2	Spring	115	12.4	♂	Trolling net	1
1121	110	2	Spring	102.5	8.5	♀	Driftnet	1
1122	110	2	Spring	102	7.7	♂	Driftnet	1
1123	110	2	Spring	107.5	9.3	♂	Driftnet				1	19.72
1124	110	2	Spring	102.5	8.2	♀	Driftnet	1
1125	110	2	Spring	110	8.8	♀	Trolling net	1
1126	110	2	Spring	108.5	9	♀	Driftnet	1
1127	110	2	Spring	107.5	10.6	♀	Driftnet	1
1128	110	2	Spring	104.5	7.9	♀	Driftnet	1
1129	110	2	Spring	105	9.1	♀	Driftnet	1
1130	110	2	Spring	106	8.6	♂	Driftnet	1
1131	110	2	Spring	106	8.9	♀	Driftnet	1
1132	110	2	Spring	101	9.5	♀	Driftnet				1	4.93
1133	110	2	Spring	110	11.7		Trolling net	1
1134	110	2	Spring	111	12.2		Driftnet	1
1135	110	2	Spring	109	10.1		Driftnet	1
1136	110	2	Spring	105	9.5		Driftnet	1
1137	110	2	Spring	107	9.7		Driftnet	1
1138	110	2	Spring	101	9.3	♂	Driftnet	1
1139	110	2	Spring	106	9.9		Driftnet	1
1140	110	2	Spring	99	8.3		Driftnet	1
1141	110	2	Spring	101	8.7		Driftnet	1
1142	110	2	Spring	97	7.3		Driftnet	1
1143	110	2	Spring	95	7.4	♂	Driftnet	1
1144	110	2	Spring	95	7.6		Driftnet	1
1145	110	2	Spring	94	7.4		Driftnet	1
1146	110	2	Spring	94	7.2		Driftnet	1
1147	110	2	Spring	94	7		Driftnet	1
1148	110	2	Spring	97	7.5	♂	Driftnet	1
1149	110	2	Spring	107	10.5	♀	Driftnet	1
1150	110	2	Spring	111	12.3		Driftnet	1
1151	110	2	Spring	112	11.1		Driftnet	1
1152	110	2	Spring	96	7	♂	Driftnet	1
1153	110	2	Spring	92	5.8		Driftnet	1
1154	110	2	Spring	110	11.2	♀	Driftnet				1	7.32
1155	110	2	Spring	116	11.1		Driftnet	1
1156	110	2	Spring	87	6.2	♂	Driftnet	1
1157	110	2	Spring	97	6.7		Driftnet	1
1158	110	2	Spring	95	6.4	♀	Driftnet	1
1159	110	2	Spring	99	6.9		Driftnet	1
1160	110	2	Spring	97	7.3		Driftnet	1
1161	110	2	Spring	100	8.1	♂	Driftnet	1
1162	110	2	Spring	97	7.3	♂	Driftnet	1
1163	110	2	Spring	88	6.3	♀	Driftnet		1	35.46
1164	110	2	Spring	89	5.9	♂	Driftnet	1
1165	110	2	Spring	112	12.3	♂	Driftnet	1
1166	110	2	Spring	114	11.1	♀	Driftnet	1
1167	110	2	Spring	106	9.1	♀	Trolling net	1
1168	110	2	Spring	101	8	♀	Trolling net	1
1169	110	2	Spring	115	11.1	♀	Driftnet	1
1170	110	2	Spring	115	11.6	♀	Driftnet	1
1171	110	2	Spring	120	12.6	♀	Trolling net	1
1172	110	2	Spring	119	12.8	♀	Trolling net	1
1173	110	2	Spring	109	10.1		Longline	1
1174	110	2	Spring	111	11		Driftnet	1
1175	110	2	Spring	109	10.5		Trolling net	1
1176	110	2	Spring	108	9.4	♂	Longline	1
1177	110	2	Spring	115	12.4	♀	Driftnet	1
1178	110	2	Spring	105	11.3	♀	Driftnet		1	78.7	1	5.55
1179	110	2	Spring	110	10.3	♀	Driftnet	1
1180	110	2	Spring	115	11		Driftnet	1
1181	110	2	Spring	92	6		Longline	1
1182	110	2	Spring	90	6.2	♂	Longline	1
1183	110	2	Spring	91	6.7	♀	Longline	1
1184	110	2	Spring	92	6.9		Longline	1
1185	110	2	Spring	108	11.9	♀	Longline	1
1186	110	3	Spring	108	10.8	♀	Longline	1
1187	110	3	Spring	105	10.9	♀	Longline	1
1188	110	3	Spring	108	10.8	♀	Driftnet	1
1189	110	3	Spring	103	9.3		Driftnet	1
1190	110	3	Spring	110	9.8	♀	Driftnet	1
1191	110	3	Spring	106	10.1	♀	Driftnet	1
1192	110	3	Spring	116	12.2	♂	Driftnet				1	8.12
1193	110	3	Spring	109	11.6	♂	Driftnet	1
1194	110	3	Spring	102	8.9	♀	Driftnet	1
1195	110	3	Spring	94	6.5	♀	Driftnet	1
1196	110	3	Spring	99	8.6	♂	Driftnet				1	11.81
1197	110	3	Spring	100	8.3	♂	Driftnet	1
1198	110	3	Spring	90	6.3	♂	Driftnet				1	35.29
1199	110	3	Spring	110	11.8	♀	Driftnet	1
1200	110	3	Spring	109	10.4	♂	Driftnet				1	5.4
1201	110	3	Spring	107	9.8	♂	Longline				1	10.6
1202	110	3	Spring	101	8.7	♂	Longline		1	25.01
1203	110	3	Spring	101	8.2	♀	Longline										4	7.24
1204	110	3	Spring	99	7.3	♂	Longline	1
1205	110	3	Spring	98	7.3	♂	Longline				1	4.94
1206	110	3	Spring	98	7	♂	Longline				1	5.81
1207	110	3	Spring	92	6.6	♂	Driftnet	1
1208	110	3	Spring	95	6.7	♂	Driftnet										5	7.81
1209	110	3	Spring	102	9.4	♂	Trolling net	1
1210	110	3	Spring	103	8.7	♂	Trolling net										4	7.77
1211	110	3	Spring	103	8.5	♂	Longline	1
1212	110	3	Spring	102	8.4		Longline	1
1213	110	3	Spring	96	8.1		Longline	1
1214	110	3	Spring	100	7.8	♀	Longline	1
1215	110	3	Spring	98	8.2		Longline	1
1216	110	3	Spring	96	7.9		Driftnet	1
1217	110	3	Spring	99	7.8		Driftnet	1
1218	110	3	Spring	100	7.5		Driftnet	1
1219	110	3	Spring	95	7.3	♂	Driftnet	1
1220	110	3	Spring	99	7.3	♀	Driftnet	1
1221	110	3	Spring	97	7.5	♀	Driftnet	1
1222	110	3	Spring	98	7.1	♀	Driftnet				1	2.68
1223	110	3	Spring	95	7		Driftnet	1
1224	110	3	Spring	95	6.8		Driftnet	1
1225	110	3	Spring	95	6.9	♀	Driftnet	1
1226	110	3	Spring	94	6.4	♂	Driftnet	1
1227	110	3	Spring	91	6		Driftnet	1
1228	110	3	Spring	95	7.2		Driftnet	1
1229	110	3	Spring	96	7.3		Driftnet	1
1230	110	3	Spring	98	7		Driftnet	1
1231	110	3	Spring	93	6.6		Driftnet	1
1232	110	3	Spring	98	7.1		Driftnet	1
1233	110	3	Spring	97	6.5	♀	Driftnet				1	2.92
1234	110	3	Spring	99	6.9		Driftnet	1
1235	110	3	Spring	99	7.6	♀	Driftnet	1
1236	110	3	Spring	96	7.1		Driftnet	1
1237	110	3	Spring	95.5	6.5		Driftnet	1
1238	110	3	Spring	114	10.2		Driftnet										5	17.6	11	42.45
1239	110	3	Spring	94	6.1		Driftnet	1
1240	110	3	Spring	97	6.2		Driftnet				1	10.39
1241	110	3	Spring	97	6.9		Driftnet				1	4.09
1242	110	3	Spring	89	5.1		Trolling net	1
1243	110	3	Spring	90	6		Driftnet	1
1244	110	3	Spring	96	6.2		Trolling net	1
1245	110	3	Spring	104	9.4		Trolling net	1
1246	110	3	Spring	102	8		Trolling net	1
1247	110	3	Spring	101	7.7		Trolling net				1	25.26
1248	110	3	Spring	93.5	6.1		Trolling net	1
1249	110	3	Spring	92	5.9		Trolling net				1	5.94
1250	110	3	Spring	93	6.5		Longline	1
1251	110	3	Spring	88	5.2		Trolling net	1
1252	110	3	Spring	89	5.3		Trolling net				1	2.64
1253	110	3	Spring	107	9.4	♀	Longline				1	10.06
1254	110	3	Spring	104	9.5		Longline				1	23.08
1255	110	3	Spring	106	8.6	♂	Longline				1	5.1
1256	110	3	Spring	119	13.2		Driftnet	1
1257	110	3	Spring	113	9.7	♀	Driftnet				1	7.07
1258	110	3	Spring	97	8	♂	Longline				1	13.06
1259	110	3	Spring	107	8.9	♀	Longline	1
1260	110	3	Spring	101	8.1	♂	Trolling net				1	6.2
1261	110	3	Spring	101	8.2	♂	Trolling net	1
1262	110	3	Spring	100	8.4	♂	Trolling net	1
1263	110	3	Spring	100	8.5	♂	Trolling net	1
1264	110	3	Spring	103	8.7	♂	Trolling net				1	101.62
1265	110	3	Spring	102	7.5	♂	Trolling net	1
1266	110	3	Spring	98	7.6	♂	Longline				1	8.13
1267	110	3	Spring	90	6.1	♂	Longline	1
1268	110	3	Spring	97	6.8	♀	Trolling net	1
1269	110	3	Spring	96	6.4	♂	Trolling net				1	28.22
1270	110	3	Spring	94	6.6	♀	Trolling net	1
1271	110	3	Spring	91	5.7	♀	Driftnet	1
1272	110	3	Spring	95	6	♂	Driftnet	1
1273	110	3	Spring	112	10.6	♀	Driftnet				1	8.16
1274	110	3	Spring	111	11	♂	Driftnet	1
1275	110	3	Spring	104	9.6	♂	Driftnet	1
1276	110	3	Spring	103	8.9	♂	Driftnet				1	10.09
1277	110	3	Spring	104	9.7		Driftnet	1
1278	110	3	Spring	103	8.7	♀	Trolling net				1	11.14
1279	110	3	Spring	101	9.4		Trolling net	1
1280	110	3	Spring	101	8.4	♂	Longline	1
1281	110	3	Spring	117	12.3	♂	Longline	1
1282	110	3	Spring	112	11.4	♀	Longline				1	1.69
1283	110	3	Spring	110	10.8	♀	Longline				1	0.98
1284	110	3	Spring	111	10.7	♀	Longline				1	70.58
1285	110	3	Spring	113	12.2	♀	Longline	1
1286	110	3	Spring	113	11.8	♀	Longline				1	5.94
1287	110	3	Spring	128	16.3		Longline	1
1288	110	3	Spring	111	10.5		Trolling net	1
1289	110	3	Spring	97	6.5		Longline	1
1290	110	3	Spring	86			Trolling net	1
1291	110	3	Spring	123	14.7	♀	Trolling net	1
1292	110	3	Spring	113	12.5	♂	Trolling net	1
1293	110	3	Spring	120	13.4	♀	Longline				1	11.3
1294	110	3	Spring	109	10.4	♂	Longline	1
1295	110	3	Spring	106	9.9	♀	Longline	1
1296	110	3	Spring	107	8.8	♀	Longline	1
1297	110	3	Spring	115	11.6	♀	Longline	1
1298	110	3	Spring	115	12.2	♂	Longline				1	3.99
1299	110	4	Spring	108	10.2	♂	Driftnet	1
1300	110	4	Spring	116	11.5	♀	Driftnet				1	9.37
1301	110	4	Spring	112	11.2	♂	Driftnet	1
1302	110	4	Spring	88	5.2		Driftnet	1
1303	110	4	Spring	92	5.8	♂	Driftnet				1	1.61
1304	110	4	Spring	93	6.8	♂	Driftnet	1
1305	110	4	Spring	95	6.8	♂	Driftnet	1
1306	110	4	Spring	112	10.7	♂	Driftnet				1	49.51
1307	110	4	Spring	112	10.7	♀	Driftnet				1	3.09
1308	110	4	Spring	113	10.5	♀	Driftnet	1
1309	110	4	Spring	107	9.2	♂	Driftnet	1
1310	110	4	Spring	124	12.8	♀	Driftnet	1
1311	110	4	Spring	108	11.5	♀	Driftnet				1	0.6
1312	110	4	Spring	107	11.3	♀	Driftnet																								1	28.9
1313	110	4	Spring	117	13.1	♀	Trolling net	1
1314	110	4	Spring	121	13.9	♀	Trolling net				1	43
1315	110	4	Spring	108	10.6	♀	Driftnet	1
1316	110	4	Spring	107	9.1	♂	Driftnet		1	30.5
1317	110	4	Spring	103	8.9	♂	Driftnet		1	76.73
1318	110	4	Spring	100	8.3	♂	Driftnet	1
1319	110	4	Spring	99	8.1	♂	Driftnet	1
1320	110	4	Spring	91	6.4	♂	Driftnet	1
1321	110	4	Spring	100.5	7.6		Driftnet	1
1322	110	4	Spring	140	19.6	♀	Longline				1	14.21													1	5.19					1	90.78
1323	110	5	Summer	112	10.3	♂	Longline	1
1324	110	5	Summer	131	17.4	♀	Longline	1
1325	110	5	Summer	142	19.2	♀	Longline																								1	63.45
1326	110	5	Summer	129.5	15.5	♀	Longline	1
1327	110	6	Summer	125	14.9	♀	Longline	1
1328	110	6	Summer	140	19.1	♀	Longline	1
1329	110	6	Summer	134	16.7	♀	Longline	1
1330	110	7	Summer	25.45	0.154	♀	light fishery	1
1331	110	7	Summer	24.38	0.141	♂	light fishery	1
1332	110	7	Summer	27.57	0.193	♀	light fishery	1
1333	110	8	Autumn	45	0.8	♀	Trawling net				1	3.51
1334	110	8	Autumn	42.5	0.62	♂	Trawling net												2	21.77
1335	110	11	Winter	92.5	7.2		Longline	1
1336	110	11	Winter	99.5	7.2		Longline	1
1337	110	11	Winter	110	10.5		Driftnet	1
1338	110	11	Winter	107	9.8	♀	Longline				1	14.49
1339	110	11	Winter	88	6.1	♀	Longline	1
1340	110	11	Winter	87	6.2	♂	Longline	1
1341	110	12	Winter	104	9.8		Longline	1
1342	110	12	Winter	105	10.5		Longline	1
1343	110	12	Winter	107	9.5		Longline	1
1344	110	12	Winter	98	7.8		Longline	1
1345	110	12	Winter	96	7		Longline	1
1346	110	12	Winter	100	7.4		Longline	1
1347	110	12	Winter	103	7.7		Longline	1
1348	110	12	Winter	106	9.4		Longline	1
1349	110	12	Winter	102	9		Longline	1
1350	110	12	Winter	105	9		Longline	1
1351	110	12	Winter	98	7.1		Driftnet	1
1352	110	12	Winter	94		♀	Driftnet				1	23.21
1353	110	12	Winter	91.5	6.2		Driftnet	1
1354	110	12	Winter	91.5	6.58	♀	Driftnet				1	7.57
1355	110	12	Winter	95.5	7.3	♂	Driftnet	1
1356	110	12	Winter	90	7.13	♀	Driftnet				1	11.87
1357	110	12	Winter	90.5	6.54	♂	Driftnet				1	57.6
1358	110	12	Winter	97.5	6.6	♀	Driftnet	1
1359	110	12	Winter	92.5	6.35	♂	Driftnet				1	6.48
1360	110	12	Winter	117	11.4	♀	Longline	1
1361	110	12	Winter	101	8.7		Longline	1
1362	110	12	Winter	102	9	♀	Longline	1
1363	110	12	Winter	102	8.6	♀	Longline				1	29.73
1364	110	12	Winter	95	7	♂	Longline				1	0.23
1365	110	12	Winter	100.5	8.1	♂	Longline	1
1366	110	12	Winter	100	8.3	♀	Longline	1
1367	110	12	Winter	93	6.9	♂	Driftnet				1	6.12
1368	110	12	Winter	100.3	8.2	♀	Driftnet	1
1369	110	12	Winter	100.2	8.3	♀	Driftnet	1
1370	110	12	Winter	98.5	7.7	♂	Driftnet				1	0.31
1371	110	12	Winter	93.4	7	♀	Driftnet				1	26.66
1372	110	12	Winter	94.8	7	♀	Driftnet				1	15.78
1373	110	12	Winter	88.5	6.1	♀	Driftnet	1
1374	110	12	Winter	127	16	♂	Longline	1
1375	110	12	Winter	123.5	14.9	♀	Longline	1
1376	110	12	Winter	124	17.2	♀	Longline				1	33.72
1377	110	12	Winter	89.3	6	♀	Driftnet				1	8.93
1378	110	12	Winter	93.6	6.9	♂	Driftnet				1	49.92
1379	110	12	Winter	98.5	7.7	♀	Driftnet	1
1380	110	12	Winter	99	7.8	♂	Driftnet	1
1381	110	12	Winter	94.1	6	♀	Driftnet	1
1382	110	12	Winter	91.5	6.1	♂	Driftnet	1
1383	110	12	Winter	90.2	5.8	♂	Driftnet	1
1384	110	12	Winter	88	5.4	♂	Driftnet				1	141.44
1385	110	12	Winter	101	6.6	♀	Driftnet	1
1386	110	12	Winter	92	6.2	♂	Driftnet	1
1387	110	12	Winter	94.8	6.8	♂	Driftnet				1	20.72
1388	110	12	Winter	89.1	6	♂	Driftnet				1	25.38
1389	110	12	Winter	93.6	6.1	♀	Driftnet	1
1390	110	12	Winter	104	9	♂	Trolling net				1	89.37
1391	110	12	Winter	100	7	♀	Trolling net	1
1392	110	12	Winter	94	7	♀	Longline	1
1393	110	12	Winter	96	8.1	♀	Trolling net				1	2.56
1394	110	12	Winter	103.2	8.2	♂	Trolling net	1
1395	110	12	Winter	99.2	8.7	♀	Trolling net	1
1396	110	12	Winter	102.5	8.9	♀	Trolling net	1
1397	110	12	Winter	103	8.9	♂	Trolling net	1
1398	110	12	Winter	106	9.5	♀	Trolling net	1
1399	110	12	Winter	99	8	♀	Longline	1
1400	110	12	Winter	103.5	8.8	♀	Longline	1
1401	110	12	Winter	103.2	10.2	♂	Longline														1	91.64
1402	110	12	Winter	99	8	♀	Longline				1	151.57
1403	110	12	Winter	92	6	♀	Driftnet	1
1404	110	12	Winter	93.5	7	♂	Driftnet				1	38.39
1405	110	12	Winter	93	6	♀	Driftnet	1
1406	110	12	Winter	88	4.9		Trolling net	1
1407	110	12	Winter	110	9.9		Longline				1	3.7
1408	110	12	Winter	101	8		Driftnet				1	40.05
1409	110	12	Winter	94.5	6		Driftnet	1
1410	110	12	Winter	90	6		Driftnet				1	2.6
1411	110	12	Winter	92	6.2		Driftnet	1
1412	110	12	Winter	94	7.2		Driftnet	1
1413	110	12	Winter	97	7.2		Driftnet	1
1414	110	12	Winter	99	7		Driftnet	1
1415	110	12	Winter	97	7		Driftnet	1
1416	110	12	Winter	97.5	7.3		Driftnet	1
1417	110	12	Winter	103	8.8		Driftnet	1
1418	110	12	Winter	95	7.8		Driftnet				1	24.6
1419	110	12	Winter	94.5	7.5		Driftnet	1
1420	110	12	Winter	101.5	7.4		Driftnet	1
1421	110	12	Winter	97	7.2		Trolling net	1
1422	110	12	Winter	108	10.5		Driftnet	1
1423	110	12	Winter	88	5.7		Trolling net	1
1424	110	12	Winter	89	5.9		Trolling net	1
1425	110	12	Winter	95			Driftnet				1	1.43
1426	110	11	Winter	101.5	7.8		Driftnet	1
1427	110	11	Winter	92.5	6.2		Driftnet	1
1428	111	1	Winter	107	9.7		Trolling net	1
1429	111	1	Winter	101	7.9	♂	Trolling net	1
1430	111	1	Winter	96.5	7.6	♀	Trolling net	1
1431	111	1	Winter	99.5	8.9		Trolling net	1
1432	111	1	Winter	105	10.3		Trolling net	1
1433	111	1	Winter	106	10		Trolling net	1
1434	111	1	Winter	113	12.5		Longline	1
1435	111	1	Winter	112	11.7	♀	Longline				1	15.16
1436	111	1	Winter	113	12.4	♂	Longline	1
1437	111	1	Winter	112	12.3		Driftnet	1
1438	111	1	Winter	108	12.5	♀	Longline				1	3.23
1439	111	1	Winter	104	10.3	♂	Trolling net				1	18.31
1440	111	1	Winter	98	8.7	♀	Trolling net	1
1441	111	1	Winter	98	8.7		Trolling net	1
1442	111	1	Winter	99	8.7	♀	Trolling net				1	51.64
1443	111	1	Winter	102	8.9		Longline	1
1444	111	1	Winter	97	8.2	♂	Longline	1
1445	111	1	Winter	104	9.5	♂	Longline	1
1446	111	1	Winter	99	8.7	♀	Longline	1
1447	111	1	Winter	105	9.7	♂	Longline	1
1448	111	1	Winter	103	9.7		Longline	1
1449	111	1	Winter	112	9.9		Driftnet	1
1450	111	1	Winter	104	9.4	♂	Driftnet	1
1451	111	1	Winter	107	10.9	♂	Longline	1
1452	111	1	Winter	107	10.2	♀	Longline	1
1453	111	1	Winter	104	10.5	♂	Longline	1
1454	111	1	Winter	110	10.5	♀	Driftnet														1	255.5
1455	111	1	Winter	106	10.4		Longline	1
1456	111	1	Winter	105	10		Driftnet	1
1457	111	1	Winter	101	10		Driftnet	1
1458	111	1	Winter	106	10.7	♀	Driftnet	1
1459	111	1	Winter	111	11		Driftnet	1
1460	111	1	Winter	106	10.2		Driftnet	1
1461	111	1	Winter	101	10		Driftnet	1
1462	111	1	Winter	102.5	8.3	♂	Driftnet	1
1463	111	1	Winter	124	14	♀	Trolling net	1
1464	111	1	Winter	120	12.5	♀	Trolling net	1
1465	111	1	Winter	98	7.2	♂	Driftnet	1
1466	111	1	Winter	95	6.7	♀	Driftnet	1
1467	111	1	Winter	93	6.4	♂	Driftnet				1	2.66					8	25.45
1468	111	1	Winter	102	6.4	♂	Driftnet				1	11.65
1469	111	1	Winter	94	5.9	♂	Driftnet	1
1470	111	1	Winter	91	5.9	♂	Driftnet								1	11.63
1471	111	1	Winter	98	8	♀	Driftnet										1	4.58
1472	111	1	Winter	95.6	7.1	♂	Driftnet	1
1473	111	1	Winter	99	8	♀	Driftnet	1
1474	111	1	Winter	96	7.4	♀	Driftnet				1	13.45
1475	111	1	Winter	95	6.6	♂	Driftnet	1
1476	111	1	Winter	97	7.2	♀	Driftnet	1
1477	111	1	Winter	97	7.3	♀	Driftnet	1
1478	111	1	Winter	99	6.8	♀	Driftnet				1	5.9
1479	111	1	Winter	99	6.8	♀	Driftnet	1
1480	111	1	Winter	97	7.2	♂	Driftnet	1
1481	111	1	Winter	100	7.4	♀	Driftnet				1	1.65
1482	111	1	Winter	94	6.2	♀	Driftnet	1
1483	111	1	Winter	89	6.1	♂	Driftnet				1	3.18
1484	111	1	Winter	95	6.4	♀	Driftnet				1	0.54
1485	111	1	Winter	96.7	7.1	♀	Driftnet	1
1486	111	1	Winter	88	5.9	♂	Driftnet	1
1487	111	1	Winter	97	7.5	♂	Driftnet	1
1488	111	1	Winter	123	13.6	♀	Trolling net																		1	1.1							1	44.44
1489	111	1	Winter	104	8.1		Driftnet	1
1490	111	1	Winter	101	8	♀	Driftnet	1
1491	111	1	Winter	88	5.6	♂	Driftnet	1
1492	111	1	Winter	89	5.4	♀	Driftnet	1
1493	111	1	Winter	90	5.4	♀	Driftnet	1
1494	111	1	Winter	91	5.9	♂	Driftnet						1	37.62
1495	111	1	Winter	95	6.3	♀	Driftnet	1
1496	111	1	Winter	92	5.9	♂	Driftnet	1
1497	111	1	Winter	91	5.8		Driftnet	1
1498	111	1	Winter	120	13.4	♀	Driftnet	1
1499	111	1	Winter	115	12.8		Driftnet	1
1500	111	1	Winter	115	12.1		Driftnet	1
1501	111	1	Winter	116	12	♂	Driftnet	1
1502	111	1	Winter	113	11.8		Driftnet	1
1503	111	1	Winter	96	7.1	♀	Driftnet	1
1504	111	1	Winter	91	6.8	♂	Driftnet				1	4.71
1505	111	1	Winter	96	6.4		Driftnet	1
1506	111	1	Winter	95	6.6	♀	Driftnet	1
1507	111	1	Winter	92	6		Driftnet	1
1508	111	1	Winter	93	6.2	♂	Driftnet	1
1509	111	1	Winter	95	6.7	♀	Driftnet				1	0.55
1510	111	1	Winter	94	6.3	♀	Longline	1
1511	111	1	Winter	98	6.4	♂	Longline	1
1512	111	1	Winter	105	8.1		Longline	1
1513	111	1	Winter	111	12.1		Driftnet	1
1514	111	1	Winter	120	13		Driftnet	1
1515	111	1	Winter	122	14.5		Driftnet	1
1516	111	1	Winter	113	11.4		Driftnet	1
1517	111	1	Winter	111	11.4		Driftnet	1
1518	111	1	Winter	135	17.2		Longline				1	1.11
1519	111	1	Winter	101	7		Longline	1
1520	111	1	Winter	104	8.9		Longline	1
1521	111	1	Winter	105	9.9	♂	Longline				1	2.83
1522	111	1	Winter	96	9.3	♀	Trolling net	1
1523	111	1	Winter	103	9.7	♂	Trolling net	1
1524	111	1	Winter	93	7.1	♂	Trolling net	1
1525	111	1	Winter	94	7	♂	Trolling net		1	56.39
1526	111	1	Winter	90	7.3	♂	Driftnet	1
1527	111	1	Winter	92	6.3		Driftnet	1
1528	111	1	Winter	92	6.5	♂	Driftnet	1
1529	111	1	Winter	95	7.7	♂	Driftnet	1
1530	111	1	Winter	96	7.6	♀	Driftnet	1
1531	111	1	Winter	98	7.4	♀	Driftnet				1	14.3
1532	111	1	Winter	92	7.1	♀	Driftnet	1
1533	111	1	Winter	93	7.1	♀	Driftnet	1
1534	111	1	Winter	85	5.4	♂	Driftnet	1
1535	111	1	Winter	86	5		Trolling net	1
1536	111	1	Winter	91	5.5		Driftnet	1
1537	111	1	Winter	93	5.9	♂	Driftnet	1
1538	111	1	Winter	90	5.8	♀	Driftnet	1
1539	111	1	Winter	90	6.8	♂	Driftnet	1
1540	111	1	Winter	93	6.4		Driftnet	1
1541	111	1	Winter	93	6.4		Driftnet	1
1542	111	1	Winter	91	6.3		Driftnet	1
1543	111	1	Winter	93	6.5		Driftnet	1
1544	111	1	Winter	91	6		Driftnet	1
1545	111	1	Winter	90	6.1		Driftnet	1
1546	111	1	Winter	87	5.8		Trolling net	1
1547	111	1	Winter	102	7.7	♀	Driftnet	1
1548	111	1	Winter	101	8.5	♂	Trolling net				1	2.11
1549	111	1	Winter	95	6.97	♀	Trolling net	1
1550	111	1	Winter	97	7.2	♂	Trolling net	1
1551	111	1	Winter	97	7	♀	Trolling net	1
1552	111	1	Winter	91	7.5	♀	Trolling net	1
1553	111	1	Winter	95	7.54	♀	Longline	1
1554	111	1	Winter	112	11.3		Driftnet	1
1555	111	1	Winter	104	8.6		Longline	1
1556	111	1	Winter	97	7.5		Longline	1
1557	111	1	Winter	95	7.14		Longline	1
1558	111	1	Winter	100	8.8		Longline				1	19.94
1559	111	1	Winter	94	6.9		Longline	1
1560	111	1	Winter	93	7		Driftnet		1	9.03							1	27							1	116.42
1561	111	1	Winter	99	8.6		Driftnet	1
1562	111	1	Winter	115	12.3		Driftnet				1	2.3
1563	111	2	Spring	92	6.8	♂	Driftnet	1
1564	111	2	Spring	94	7.2	♂	Driftnet	1
1565	111	2	Spring	90	7.2	♂	Driftnet	1
1566	111	2	Spring	92	7.1	♂	Driftnet	1
1567	111	2	Spring	98	7.9	♀	Driftnet		1	70.93
1568	111	2	Spring	99	7.7	♀	Driftnet	1
1569	111	2	Spring	100	7.9	♀	Driftnet	1
1570	111	2	Spring	110	9.7		Longline	1
1571	111	2	Spring	105	10.2		Driftnet	1
1572	111	2	Spring	105	8	♀	Driftnet	1
1573	111	2	Spring	107	9	♂	Trolling net	1
1574	111	2	Spring	109	9.7	♂	Trolling net	1
1575	111	2	Spring	108	10.3	♂	Trolling net				1	11.47
1576	111	2	Spring	106	10.2	♀	Longline	1
1577	111	2	Spring	114	11.4	♀	Longline	1
1578	111	2	Spring	118	11.8	♀	Longline	1
1579	111	2	Spring	109	9.6	♂	Longline	1
1580	111	2	Spring	112	10.5	♀	Longline	1
1581	111	2	Spring	99	6.6	♀	Longline				1	7.09
1582	111	2	Spring	96.5	6.7	♀	Driftnet	1
1583	111	3	Spring	96	6.7		Driftnet	1
1584	111	3	Spring	96	6.7		Driftnet	1
1585	111	3	Spring	92	6.3		Driftnet	1
1586	111	3	Spring	114	11.1	♀	Driftnet	1
1587	111	3	Spring	108	11.1		Driftnet	1
1588	111	3	Spring	96	6.5	♀	Driftnet	1
1589	111	3	Spring	92	6.4	♀	Driftnet	1
1590	111	3	Spring	93	6.3	♂	Driftnet	1
1591	111	3	Spring	115	11.9		Driftnet	1
1592	111	3	Spring	104	9.2	♀	Driftnet	1
1593	111	3	Spring	105	9.5	♂	Driftnet	1
1594	111	3	Spring	110	10.8	♂	Driftnet				1	1
1595	111	3	Spring	96	8.2		Longline	1
1596	111	3	Spring	110	11.1		Driftnet	1
1597	111	3	Spring	107	10.9	♂	Longline	1
1598	111	3	Spring	111	10.9	♂	Driftnet	1
1599	111	3	Spring	111	10.2		Driftnet	1
1600	111	3	Spring	105	8.6	♂	Longline	1
1601	111	3	Spring	108	9.8	♂	Longline	1
1602	111	3	Spring	96	6.6	♀	Longline	1
1603	111	3	Spring	95	6.1		Longline	1
1604	111	3	Spring	108	10.8	♀	Longline	1
1605	111	3	Spring	94	6.8	♀	Longline				1	3.61
1606	111	3	Spring	110	10.1	♂	Driftnet	1
1607	111	3	Spring	109	9.9	♀	Longline				1	6.53
1608	111	3	Spring	114	10.7	♀	Driftnet				1	1.15
1609	111	3	Spring	104	8.9	♀	Trolling net	1
1610	111	3	Spring	111	11.1	♂	Driftnet	1
1611	111	3	Spring	113	12.1	♀	Driftnet	1
1612	111	3	Spring	111	10.9		Driftnet	1
1613	111	3	Spring	107	10.2	♀	Trolling net	1
1614	111	3	Spring	109	10.8	♂	Trolling net	1
1615	111	3	Spring	111	10.7		Driftnet	1
1616	111	3	Spring	106	10.3	♀	Trolling net	1
1617	111	3	Spring	105	9.2	♂	Trolling net	1
1618	111	3	Spring	104	9	♀	Trolling net				1	0.65
1619	111	3	Spring	105	9	♀	Trolling net	1
1620	111	3	Spring	106	9.4	♂	Longline	1
1621	111	3	Spring	105	9.2	♂	Longline	1
1622	111	3	Spring	102	8.5	♂	Longline	1
1623	111	3	Spring	103	9.2	♂	Longline	1
1624	111	3	Spring	102	9.3	♀	Trolling net	1
1625	111	3	Spring	96	5.8	♂	Longline	1
1626	111	3	Spring	91	6.1	♀	Longline	1
1627	111	3	Spring	107	9.9		Trolling net	1
1628	111	3	Spring	96	6.6		Driftnet	1
1629	111	3	Spring	104	8.2	♂	Driftnet	1
1630	111	3	Spring	96	8	♀	Driftnet	1
1631	111	3	Spring	103	8.6	♀	Driftnet	1
1632	111	3	Spring	84	6.4	♀	Driftnet				1	1.63
1633	111	3	Spring	86	6.6		Driftnet	1
1634	111	3	Spring	85	6.1	♀	Driftnet	1
1635	111	3	Spring	85	6.1	♂	Driftnet	1
1636	111	3	Spring	98	7.3	♀	Driftnet	1
1637	111	3	Spring	105	8.6	♀	Driftnet	1
1638	111	3	Spring	104	8.3		Trolling net	1
1639	111	3	Spring	104	7.9	♀	Trolling net	1
1640	111	3	Spring	94	7.2	♀	Driftnet	1
1641	111	3	Spring	86	7	♀	Driftnet	1
1642	111	3	Spring	99	8.5	♂	Driftnet				1	1.45
1643	111	3	Spring	117	12.5	♀	Driftnet				1	2.75
1644	111	3	Spring	100	8.8	♀	Longline	1
1645	111	3	Spring	105	9.2	♀	Longline	1
1646	111	3	Spring	99	7.8	♀	Driftnet	1
1647	111	3	Spring	102	8.8	♀	Driftnet	1
1648	111	3	Spring	98	7.6		Driftnet	1
1649	111	3	Spring	99.5	7.7		Driftnet	1
1650	111	3	Spring	100	8.2		Driftnet	1
1651	111	3	Spring	112	12.2	♀	Driftnet	1
1652	111	3	Spring	113	11.9	♀	Driftnet	1
1653	111	3	Spring	102	8.7	♂	Driftnet	1
1654	111	3	Spring	117	12.5	♀	Driftnet				1	1.61
1655	111	3	Spring	109	10.1	♀	Longline				1	20.15
1656	111	3	Spring	109	11.6	♂	Longline	1
1657	111	3	Spring	104	9.2		Longline	1
1658	111	3	Spring	112	11.6	♀	Driftnet																						1	1
1659	111	3	Spring	111	11.1		Driftnet	1
1660	111	3	Spring	102	9.1	♀	Longline				1	0.87
1661	111	3	Spring	95	7	♂	Driftnet	1
1662	111	3	Spring	116	11.2	♀	Driftnet	1
1663	111	3	Spring	102	8.9	♀	Trolling net	1
1664	111	3	Spring	103	9.5	♂	Trolling net	1
1665	111	3	Spring	110	9.6	♂	Driftnet	1
1666	111	3	Spring	109	9.8	♀	Trolling net	1
1667	111	3	Spring	105	9.3	♂	Trolling net				1	17.04
1668	111	3	Spring	105	10.5	♀	Trolling net	1
1669	111	3	Spring	113	10.6	♀	Driftnet	1
1670	111	3	Spring	104	10.6	♀	Driftnet	1
1671	111	3	Spring	108	11	♂	Driftnet	1
1672	111	3	Spring	112	11.4	♀	Driftnet	1
1673	111	3	Spring	114	12.1	♀	Longline				1	30.64
1674	111	3	Spring	115	12.5	♀	Longline	1
1675	111	3	Spring	112	12	♀	Longline	1
1676	111	3	Spring	103	8.8	♂	Driftnet				1	1.16
1677	111	3	Spring	106	8.2	♂	Driftnet	1
1678	111	3	Spring	104	8.9	♂	Driftnet	1
1679	111	3	Spring	100	7.8	♀	Trolling net	1
1680	111	3	Spring	105	9.3		Trolling net	1
1681	111	3	Spring	100	8	♂	Trolling net	1
1682	111	3	Spring	110	11.4	♀	Longline	1
1683	111	3	Spring	90	7.5	♀	Driftnet				1	6.13
1684	111	3	Spring	100	7.7	♀	Longline	1
1685	111	3	Spring	102	7.6	♂	Longline				1	3.13
1686	111	3	Spring	102	7.4	♂	Longline				1	6.05
1687	111	3	Spring	96	7.4	♂	Longline	1
1688	111	3	Spring	100	7.4	♀	Longline	1
1689	111	3	Spring	99	7.2	♂	Driftnet	1
1690	111	3	Spring	96	7	♀	Driftnet	1
1691	111	3	Spring	97	7	♀	Driftnet				1	4.6
1692	111	3	Spring	94	6.8	♂	Driftnet	1
1693	111	3	Spring	93	6.8	♂	Driftnet	1
1694	111	3	Spring	92	6.7	♀	Driftnet				1	24.77
1695	111	3	Spring	76	6.5		Driftnet	1
1696	111	3	Spring	91	6		Driftnet	1
1697	111	3	Spring	93	6.4	♂	Driftnet	1
1698	111	3	Spring	93.5	6.5	♂	Driftnet				1	3.55
1699	111	3	Spring	91	5.8		Driftnet	1
1700	111	3	Spring	105	9.3	♀	Driftnet	1
1701	111	3	Spring	111	9.9	♀	Longline				1	4.1
1702	111	3	Spring	105	9.1	♂	Longline				1	13.49
1703	111	3	Spring	99	7.6	♀	Driftnet	1
1704	111	3	Spring	97	8	♀	Longline	1
1705	111	3	Spring	103	9	♀	Longline		1	54.39
1706	111	3	Spring	82	6.6	♀	Driftnet	1
1707	111	3	Spring	89	6.9	♂	Driftnet	1
1708	111	3	Spring	96	7	♀	Longline	1
1709	111	3	Spring	92	6.2	♀	Longline																										1	44.5
1710	111	3	Spring	94	5.7	♀	Driftnet	1
1711	111	3	Spring	96	6.8	♂	Driftnet				1	12.2
1712	111	3	Spring	96	7.4	♂	Driftnet	1
1713	111	3	Spring	100	7.5	♀	Driftnet				1	2.03
1714	111	3	Spring	96	6.8	♀	Longline	1
1715	111	3	Spring	96	7.2	♀	Longline	1
1716	111	3	Spring	95	6.2	♀	Longline	1
1717	111	3	Spring	88	5.6	♂	Driftnet				1	2.07
1718	111	3	Spring	89	6.6	♂	Driftnet	1
1719	111	3	Spring	86	6.6	♀	Driftnet	1
1720	111	3	Spring	88	6.2	♀	Driftnet	1
1721	111	3	Spring	87	6.1	♂	Driftnet	1
1722	111	3	Spring	105	9.3	♀	Driftnet				1	3.42
1723	111	3	Spring	104	8.2		Driftnet	1
1724	111	3	Spring	98	7.2		Driftnet	1
1725	111	3	Spring	97	7.1	♂	Driftnet	1
1726	111	3	Spring	97	7.1	♂	Driftnet				1	3.01
1727	111	3	Spring	92	6.2	♂	Driftnet	1
1728	111	3	Spring	92	6.1	♀	Driftnet	1
1729	111	3	Spring	92	6.4	♂	Driftnet	1
1730	111	3	Spring	88	5.5	♂	Driftnet				1	2.7
1731	111	3	Spring	102	8	♀	Longline	1
1732	111	3	Spring	100	8	♀	Longline				1	3.58
1733	111	3	Spring	96	6.8	♀	Driftnet	1
