# Supplementary material for: Feeding ecology and trophic interactions of the narrow-barred Spanish Mackerel (Scomberomorus commerson) in the Central Taiwan Strait
Source: PeerJ. 2025 Nov 14;13:e20350. doi: 10.7717/peerj.20350 (PMC12622235; doi:10.7717/peerj.20350)
Supplement: Supplemental Information 9 [file peerj-13-20350-s009.xlsx]

## Sheet: S. commerson
month	FL	d15N	d13C	TPgeneral (3.4)	TPc (3.72)	amount %N	amount %C	C:Nbulk
1	31	12.166	-16.369	3.71647	3.56882	13.294	42.258	3.17873
9	31.6	12.7228	-17.8137	3.88023	3.71849	13.076	46.959	3.59124
1	35	12.195	-16.456	3.725	3.57661	14.361	45.538	3.17095
1	35	12.723	-16.516	3.88029	3.71855	14.823	46.807	3.15773
1	36.5	12.899	-16.702	3.93206	3.76586	15.19	47.958	3.15721
1	37.5	12.359	-16.441	3.77324	3.6207	14.518	46.414	3.197
1	40	12.265	-16.762	3.74559	3.59543	14.755	46.873	3.17675
9	41.1	12.4635	-15.6029	3.80398	3.6488	14.148	44.919	3.17494
10	43.7	13.6152	-16.7782	4.1427	3.95839	14.491	46.533	3.21117
10	56	12.0505	-16.5715	3.6825	3.53776	13.592	43.229	3.18047
1	58	13.573	-16.061	4.13029	3.94704	14.231	45.292	3.18263
1	58.5	13.37	-16.4	4.07059	3.89247	14.066	45.478	3.23319
1	58.5	13.665	-15.802	4.15735	3.97177	14.187	46.152	3.25312
1	62	13.273	-15.764	4.04206	3.8664	13.369	44.589	3.33525
1	63	12.768	-15.973	3.89353	3.73065	11.408	43.18	3.78506
1	64	13.332	-16.008	4.05941	3.88226	12.287	44.829	3.64849
1	64.5	13.672	-15.565	4.15941	3.97366	14.979	54.775	3.65679
10	66.5	13.4343	-15.7863	4.0895	3.90976	12.17	49.656	4.0802
1	68.5	13.538	-15.997	4.12	3.93763	12.17	49.656	4.0802
1	69.5	13.842	-16.083	4.20941	4.01935	10.596	46.419	4.3808
4	70	13.662	-15.879	4.15647	3.97097	11.59	42.777	3.69085
4	73	13.449	-18.092	4.09382	3.91371	13.334	43.491	3.26166
4	73	13.331	-17.343	4.05912	3.88199	11.726	47.41	4.04315
4	73	14.275	-17.127	4.33676	4.13575	14.419	49.6	3.43991
4	74	13.928	-15.949	4.23471	4.04247	12.704	44.474	3.50079
4	75	13.678	-15.527	4.16118	3.97527	11.613	39.794	3.42668
4	75.5	13.177	-17.964	4.01382	3.84059	12.078	48.517	4.01697
4	76.5	13.692	-16.51	4.16529	3.97903	11.876	41.545	3.49823
4	77	13.36	-17.125	4.06765	3.88978	11.52	38.9	3.37674
4	77	14.014	-16.536	4.26	4.06559	12.961	44.96	3.46887
4	77	14.896	-17.453	4.51941	4.30269	15.071	48.972	3.24942
5	78	14.132	-16.542	4.29471	4.09731	13.083	42.75	3.2676
5	78	14.036	-16.443	4.26647	4.07151	13.52	44.129	3.26398
5	78.5	14.251	-16.306	4.32971	4.1293	14.934	48.647	3.25747
5	78.5	14.246	-16.381	4.32824	4.12796	13.111	43.046	3.2832
5	81	14.516	-16.2	4.40765	4.20054	13.902	45.375	3.26392
5	81	14.103	-17.316	4.28618	4.08952	13.205	43.822	3.31859
5	81	13.2102	-15.6637	4.02359	3.84952	13.645	44.558	3.26552
8	82	14.091	-16.283	4.28265	4.08629	14.054	45.409	3.23104
8	82	13.717	-18.411	4.17265	3.98575	14.386	46.131	3.20666
8	82	13.436	-16.032	4.09	3.91022	11.551	48.59	4.20656
8	82.5	13.496	-18.063	4.10765	3.92634	13.565	48.22	3.55474
8	83	14.062	-17.827	4.27412	4.07849	13.569	50.985	3.75746
8	83	13.581	-18.139	4.13265	3.94919	10.739	49.517	4.61095
6	83	14.527	-17.736	4.41088	4.20349	10.693	49.425	4.62218
6	83	13.571	-16.638	4.12971	3.94651	11.828	50.906	4.30386
6	84	13.863	-18.178	4.21559	4.025	13.565	48.22	3.55474
2	84	13.139	-19.621	4.00265	3.83038	13.885	50.586	3.64321
2	84.5	13.964	-16.163	4.24529	4.05215	12.08	49.165	4.06995
2	84.5	13.829	-18.65	4.20559	4.01586	10.519	46.061	4.37884
2	85.5	13.759	-17.24	4.185	3.99704	11.944	47.712	3.99464
2	86	13.42	-16.731	4.08529	3.90591	13.488	46.268	3.43031
2	86	13.486	-16.566	4.10471	3.92366	13.542	47.961	3.54165
2	86	14.384	-16.916	4.36882	4.16505	13.32	45.836	3.44114
2	87	13.39	-15.914	4.07647	3.89785	14.071	47.386	3.36764
3	87	13.436	-19.606	4.09	3.91022	13.342	45.321	3.39687
3	87	13.562	-16.993	4.12706	3.94409	13.649	50.903	3.72943
3	88	13.906	-16.139	4.22824	4.03656	11.535	45.912	3.98023
3	88	13.499	-16.751	4.10853	3.92715	10.627	43.186	4.0638
3	88	13.553	-16.207	4.12441	3.94167	11.16	40.292	3.61039
3	88	13.473	-20.146	4.10088	3.92016	8.954	45.958	5.13268
3	88	13.541	-19.558	4.12088	3.93844	11.159	47.372	4.24518
3	88.5	13.539	-17.24	4.12029	3.9379	11.045	43.662	3.9531
3	88.5	13.869	-16.068	4.21735	4.02661	12.123	49.229	4.06079
3	88.5	14.169	-17.691	4.30559	4.10726	12.852	51.278	3.98988
3	89	12.945	-16.952	3.94559	3.77823	13.021	43.403	3.33331
3	89	14.067	-18.15	4.27559	4.07984	14.728	47.94	3.25502
3	89	13.573	-18.171	4.13029	3.94704	12.191	40.586	3.32918
3	90	13.52	-16.19	4.11471	3.9328	12.945	42.562	3.28791
3	90	13.837	-16.492	4.20794	4.01801	13.339	44.643	3.3468
3	90	13.488	-16.093	4.10529	3.92419	12.738	44.776	3.51515
3	90	12.521	-17.102	3.82088	3.66425	13.915	52.761	3.79166
3	90	12.976	-19.627	3.95471	3.78656	11.223	47.883	4.26651
3	90	14.277	-18.992	4.33735	4.13629	15.621	48.951	3.13367
3	90.5	13.827	-17.165	4.205	4.01532	14.111	45.053	3.19276
3	91	13.499	-17.692	4.10853	3.92715	12.675	40.364	3.18454
3	91	13.71	-16.736	4.17059	3.98387	15.415	48.129	3.12222
3	91	13.635	-18.77	4.14853	3.96371	13.834	43.988	3.1797
7	91	13.693	-17.557	4.16559	3.9793	13.169	41.645	3.16235
7	92.5	13.92	-18.032	4.23235	4.04032	14.328	45.047	3.14398
7	93	12.907	-16.872	3.93441	3.76801	15.491	49.17	3.1741
7	93	12.809	-16.175	3.90559	3.74167	13.959	44.208	3.16699
7	93	13.901	-18.153	4.22676	4.03522	13.863	42.919	3.09594
8	93.5	14.299	-16.016	4.34382	4.1422	14.41	45.3	3.14365
8	93.5	13.169	-19.128	4.01147	3.83844	14.493	45.991	3.17333
8	94	12.737	-16.518	3.88441	3.72231	16.081	50.47	3.13849
8	94	13.036	-16.141	3.97235	3.80269	16.6348	71.1199	4.27537
8	94	13.025	-19.389	3.96912	3.79973	16.081	40.8909	2.54281
8	94	13.022	-19.058	3.96824	3.79892	16.081	36.4598	2.26726
8	95	13.82	-15.962	4.20294	4.01344	16.028	39.4078	2.45868
8	95	13.395	-19.815	4.07794	3.89919	11.9059	38.9934	3.27512
9	95	14.005	-18.634	4.25735	4.06317	11.7123	43.5542	3.71867
9	95	13.543	-16.428	4.12147	3.93898	14.4133	47.9293	3.32536
9	96	13.65	-15.951	4.15294	3.96774	12.3877	41.4317	3.34457
9	96	14.74	-19.139	4.47353	4.26075	7.44583	29.7103	3.9902
9	96	14.376	-17.998	4.36647	4.1629	8.18261	28.6633	3.50295
9	96	13.335	-19.177	4.06029	3.88306	7.19503	36.0181	5.00596
9	97	14.12	-18.924	4.29118	4.09409	12.9136	42.2345	3.27055
9	97.5	13.842	-15.944	4.20941	4.01935	13.818	47.7276	3.45403
9	98	13.466	-16.404	4.09882	3.91828	13.0337	43.1533	3.3109
10	98	12.899	-16.702	3.93206	3.76586	12.479	41.7569	3.34618
10	98	14.092	-15.681	4.28294	4.08656	14.973	42.69	2.85113
10	98	13.374	-16.279	4.07176	3.89355	2.5682	13.1098	5.10465
10	98	13.083	-16.822	3.98618	3.81532	16.0056	49.3745	3.08483
10	99.5	13.524	-16.692	4.11588	3.93387	12.6262	42.0836	3.33303
10	99.5	13.941	-15.874	4.23853	4.04597	14.9497	43.4956	2.90946
11	100	12.039	-17.983	3.67912	3.53468	15.3499	43.1778	2.81291
11	100.5	13.217	-16.14	4.02559	3.85134	13.8114	39.6852	2.87337
11	101	13.63	-16.887	4.14706	3.96237	15.1526	43.3703	2.86224
11	101.5	13.412	-17.329	4.08294	3.90376	15.5989	44.7816	2.87082
11	101.5	13.725	-20.038	4.175	3.9879	15.5769	44.3511	2.84724
11	102	13.311	-15.754	4.05324	3.87661	16.0056	44.9235	2.80674
11	102	13.791	-16.209	4.19441	4.00565	14.7384	44.6086	3.0267
11	102	13.396	-15.895	4.07824	3.89946	15.0443	44.2937	2.94421
11	103	14.144	-18.577	4.29824	4.10054	13.9288	38.5218	2.76562
11	103.5	13.655	-16.002	4.15441	3.96909	13.178	35.8601	2.72122
11	103.5	13.611	-16.672	4.14147	3.95726	15.3325	42.0116	2.74003
12	103.5	13.01	-16.009	3.96471	3.7957	12.9687	42.6761	3.2907
12	104	13.032	-16.427	3.97118	3.80161	14.973	44.0811	2.94404
12	104	13.299	-16.908	4.04971	3.87339	14.8988	43.4129	2.91385
12	104.5	13.521	-16.138	4.115	3.93306	16.6041	47.4669	2.85874
12	105	13.738	-16.284	4.17882	3.9914	16.4495	49.45	3.00616
12	105	13.195	-17.28	4.01912	3.84543	15.0562	44.8591	2.97945
12	105	13.68	-15.652	4.16176	3.97581	15.2047	46.331	3.04715
12	105.5	13.513	-16.619	4.11265	3.93091	14.5272	39.9085	2.74715
12	105.5	13.324	-15.515	4.05706	3.88011	14.1312	42.9605	3.04011
12	106.5	13.511	-17.514	4.11206	3.93038	16.4194	45.1629	2.75059
12	107	13.975	-20.033	4.24853	4.05511	14.9497	41.3996	2.76926
12	107	14.082	-17.68	4.28	4.08387	11.1985	33.4318	2.98539
12	107	12.795	-18.169	3.90147	3.7379	16.2487	45.2593	2.78541
12	107	13.314	-18.527	4.05412	3.87742	15.3499	43.1778	2.81291
12	107.5	13.772	-15.98	4.18882	4.00054	13.8114	39.6852	2.87337
12	108	13.759	-16.51	4.185	3.99704	15.1526	43.3703	2.86224
12	108	13.778	-15.814	4.19059	4.00215	15.5989	44.7816	2.87082
12	108	14.126	-18.014	4.29294	4.0957	15.5769	44.3511	2.84724
12	110	13.683	-17.601	4.16265	3.97661	16.0056	44.9235	2.80674
3	110	13.651	-17.133	4.15324	3.96801	14.7384	44.6086	3.0267
3	110	14.591	-19.054	4.42971	4.2207	15.0443	44.2937	2.94421
3	110.5	13.972	-18.627	4.24765	4.0543	13.9288	38.5218	2.76562
3	112.5	13.707	-17.48	4.16971	3.98306	13.178	35.8601	2.72122
4	116	13.461	-18.437	4.09735	3.91694	15.3325	42.0116	2.74003
4	116	14.508	-18.192	4.40529	4.19839	12.9687	42.6761	3.2907
4	116.5	12.116	-18.438	3.70176	3.55538	14.973	44.0811	2.94404
4	120	13.254	-15.957	4.03647	3.86129	14.8988	43.4129	2.91385
3	121	14.393	-16.395	4.37147	4.16747	16.6041	47.4669	2.85874
3	122	14.341	-16.926	4.35618	4.15349	16.4495	49.45	3.00616
3	129	13.576	-16.978	4.13118	3.94785	15.0562	44.8591	2.97945
3	134	12.41	-18.391	3.78824	3.63441	15.2047	46.331	3.04715
3	138	15.255	-19.152	4.625	4.39919	14.5272	39.9085	2.74715
3	142	14.28	-16.455	4.33824	4.1371	14.1312	42.9605	3.04011
3	142.5	14.004	-15.514	4.25706	4.0629	16.4194	45.1629	2.75059
3	159	13.871	-16.15	4.21794	4.02715	14.9497	41.3996	2.76926

## Sheet: prey species
Copepods	d15N	d13C	Encrasicholina punctifer	d15N	d13C	Engraulis japonicus	d15N	d13C	Sardinella lemuru	d15N	d13C	Decapterus macarellus	d15N	d13C	Decapterus maruadsi	d15N	d13C	Scomber japonicus	d15N	d13C	Etrumeus micropus	d15N	d13C	Uroteuthis duvaucelii	d15N	d13C	Uroteuthis edulis	d15N	d13C	Auxis rochei rochei	d15N	d13C	Mene maculate	d15N	d13C	Euthynnus affinis	d15N	d13C	Trichiurus spp.	d15N	d13C	Uroteuthis chinensis	d15N	d13C	semi-digested fish remains	d15N	d13C	Evynnis cardinalis	d15N
	6.583	-18.801		10.646	-18.248		9.239	-17.603		7.805	-16.254		8.021	-17.121		9.326	-16.727		8.428	-17.09		6.709	-17.544		11.189	-16.758		10.387	-16.639		10.94	-16.765		9.963	-16.713		12.15	-17.177		12.894	-16.475		10.375	-18.097		10.8878	-16.842		11.894
	6.812	-18.598		10.583	-18.379		9.718	-17.355		7.127	-16.806		7.293	-17.144		8.897	-16.506		8.698	-16.601		7.02	-17.628		10.999	-17.978		10.197	-17.859		11.188	-17.12		10.264	-17.105		11.372	-17.384		12.431	-17.652		10.363	-18.158		9.61951	-19.6505		12.095
	5.294	-19.986		10.646	-18.404		9.733	-17.454		8.371	-16.171		6.92	-16.904		8.902	-16.544		8.29	-16.784		6.982	-17.617		10.854	-17.942					10.719	-16.97		8.893	-16.446		11.712	-17.365		11.936	-17.426		10.144	-18.352					12.404
	6.025	-20.201		10.486	-18.427		10.706	-18.581														8.419	-17.544		10.301	-18.63														9.92401	-18.0903
	6.959	-19.097					8.32	-17.775														8.73	-17.628		10.687	-18.19														10.0496	-17.9211
							9.493	-18.969														8.692	-17.617		10.99	-18.105														11.9791	-18.1328
																									10.877	-18.178														10.9561	-17.687
																																								11.1933	-17.9484
																																								10.5782	-18.0913
																																								12.159	-16.6769
[truncated: 22 more columns]
